# Supplementary material for: The Xa7 resistance gene guards the rice susceptibility gene SWEET14 against exploitation by the bacterial blight pathogen
Source: PubMed Central journal article supplement (PMC8132128; doi:10.1016/j.xplc.2021.100164), 2021-01-19
Supplement: mmc1.pdf [file mmc1.pdf]

**Plant Communications, Volume 2**

**Supplemental information**

**The *Xa7* resistance gene guards the rice susceptibility gene *SWEET14*  
against exploitation by the bacterial blight pathogen**

**Dangping Luo, Jose C. Huguet-Tapia, R. Taylor Raborn, Frank F. White, Volker P. Brendel, and Bing Yang**

# The *Xa7* Resistance Gene Guards the Susceptibility Gene *SWEET14* of Rice Against Exploitation by Bacterial Blight Pathogen

Dangping Luo<sup>1</sup>, Jose C. Huguet-Tapia<sup>2</sup>, Taylor R. Raborn<sup>3</sup>, Frank F. White<sup>2</sup>, Volker P. Brendel<sup>3</sup>, Bing Yang<sup>1,4,\*</sup>

<sup>1</sup> Division of Plant Sciences, Bond Life Sciences Center, University of Missouri, Columbia, MO 65211, USA

<sup>2</sup> Department of Plant Pathology, University of Florida, Gainesville, FL 32611, USA

<sup>3</sup> Department of Biology, Department of Computer Science, Indiana University, Bloomington, IN 47405, USA

<sup>4</sup> Donald Danforth Plant Science Center, St. Louis, MO 63132, USA

\* Correspondence: Bing Yang ([yangbi@missouri.edu](mailto:yangbi@missouri.edu))

## Files:

Supplemental Table 1. Molecular markers used in this study

Supplemental Table 2. Oligonucleotides used in this study

Supplemental Information 1. The cDNA sequence of *Xa7*

Supplemental Information 2. gBlocks of *Xa7* homologous genes

Supplemental File 1. Program for genome assembly

Supplemental Figure 1. Large chromosomal fragment deletion of *Xa7* locus

Supplemental Figure 2. Screenshot of RAMPAGE analysis displayed with the Integrative Genomics Viewer (Thorvaldsdóttir, Robinson et al. 2013)

Supplemental Figure 3. *Xa7* and homologs in diverse grass species

**Supplemental Table 1. Molecular markers used in this study.**

| Marker  | Primer   | Size in IRBB7 (bp) | Size in Nipponbare (bp) |
|---------|----------|--------------------|-------------------------|
| RM7243  | RM7243F  | 150                | 158                     |
|         | RM7243R  |                    |                         |
| RM20571 | RM20571F | 123                | 117                     |
|         | RM20571R |                    |                         |
| RM5509  | RM5509F  | 229                | 255                     |
|         | RM5509R  |                    |                         |
| 5610    | 5610F    | 261                | 231                     |
|         | 5610R    |                    |                         |
| M5      | M5-F     | 343                | 1219                    |
|         | M5-R     |                    |                         |
| M5-3k   | M5-3kF   | 143                | 122                     |
|         | M5-3kR   |                    |                         |
| M5-5k   | M5-5kF   | 107                | 104                     |
|         | M5-5kR   |                    |                         |
| M5-48k  | M5-48kF  | 152                | 144                     |
|         | M5-48kR  |                    |                         |
| M5-72k  | M5-72kF  | 127                | 136                     |
|         | M5-72kR  |                    |                         |
| RM20593 | RM20593F | 314                | 316                     |
|         | RM20593R |                    |                         |
| RM3723  | RM3723F  | 130                | 138                     |
|         | RM3723R  |                    |                         |

**Sequences of each markers in IRBB7 and Nipponbare**

**RM7243**

IRBB7

AAGATGGCGTGCGTACGTACGTACGTGCGGCGCGGGCGTACAGGCGTACAGGGCGC  
CGCGCGACGCATGGATGGATGGATCGATGGATCGATGGTCCCAGGGCGGCACAGGCA  
GGGGCTCCCCGACCGGGCAACCCGTGAAGAACTTCGT

Nipponbare

AAGATGGCGTGCGTACGTACGTACGTGCGGCGCGGGCGTACAGGCGTACAGGGCGC  
CGCGCGACGCATGGATGGATGGATGGATGGATCGATGGATCGATGGTCCCAGGGCGG  
CACAGGCAGGGGCTCCCCGACCGGGCAACCCGTGAAGAACTTCGT

**RM20571**

IRBB7

GAGAGGTGGAGAGATGGATGTGGAGGGTGGTGGTGGTGGTGGTGGTGGTGGTGGCG  
CGCCGCCAGGGGGAGGAATTCTTGGGTAATCAATTAAGCTTTGGTTCTTGGTTTGG  
TTCTTTGGTC



Nipponbare

CGATCTTACTGGCTCTGCAACTCTGTATTGCATGCTAAATCCGTTATGATTTACTACT  
AATGATGGATGTACTGATACATAGTACTGATCGATGAGCTAGCTAGGGTTTTGGATG  
GGTCGGAAGGTGAGAAAGAGGAGGAAAGAAGAGAGAATCTATTATATTATTAAG  
GAATAGAAAAAGAAGCCTCCACGTTTCGCTCTCACGGCCTAGAAATTCTCACATTAAT  
CGGAGAAAAGAAAAGCAGAGTCCATATAGAAATACAATTTAGAAATAGCTGAAAT  
TCGGAATTATAAAATAAGGAATATTAGAAGAGGAGACTAGAGTCCATATGGAAATA  
CAATTTAGAAATAGTTGAAATTCAGAATTAATAAATAAGAAATATTAGAAGAGGAG  
ACTAGAGTCCATATAGAAATATAATTAGGAAATAACTGAAATTCGGAATTAATAAAT  
AAGGAATATTAGAAGTAGAGTATAGAGTCCATATAAAAAATATAATTAGGAAATAAC  
TGAAATTAGGAATTAATAATAAGGAATATTAGAGATAGAGTATAGAGTCCATATAA  
AAATACAATTAGTAAATAACTGTAATTCGGAATTAATAAATAAGGAATATTAGAGGT  
AGAGTATAGAGTCCATATAGAAATACAATTAGAAAATAACTGTAATTCGGAATTA  
AAATAAGGAATATTAGAGGTAGAGTATAGAGTCCATATAAAAAATACAATTAGGAAA  
TAACTGAAATTCGGAATTAATAAATAAGGAATATTAGAGGTAGAGTATAGAGTCCAT  
ATAGAAATACAATTAGAAAATAATAAAAAATTCGGAATTAATAAATTTGATATTA  
ATAATTAATAACTAACACGTATATATAATACAATATAAATATTACACATTAGTAGTT  
TTACAAAATTTAAAATTATATTGTCATTTTAATAAATTTGAATAATACATTGAGAAA  
ACATATATGCTATTACATGAGAGAAAATATAATGATGCTAGCCGCGCAATATGCAC  
GGGCCACTATGCTAGTTGAAGATGATTAGAAGAAATCTAATCAATTCAGAGCATT  
CTGTATTCATCTTTTCAGTGTATATTCGCTCTGGGTAGTGCTGATTGTGCCATTATA  
GACGGGGTTCGTAATTCGTACGGACGAATCGACACAGACATGCATGATTGTCTTTAG  
TACTTAGAATTAGTAGCAAAGTCGGTGGGACAAC

**M5-3k**

IRBB7

CATATGTAGCAAGTATGCATCCAGCGAAACCCCATGGATTAATTAATTTGGCGGTAG  
ATCTCATCATAACAGAGAGTACGTACGTAGTAGTACTGTAGTACACTTGGATATATA  
CAAATTAAGCCAACACATTAGTCTTCAGA

Nipponbare

CATATGTAGCAAGTATGCATCCAGCGAAACCCCTAGATCTCATCATAACAGAGAGT  
ACGTACGTAGTAGTACTGTAGTACACTTGGATATATACAAATTAAGCCAACACATTA  
GTCTTCAGA

**M5-5k**

IRBB7

TGTAGAGATTGTGACGAGGAGCAGTGCAAGTTTCAGGTAGTGATGCATCAGGCGTTT  
GCCCTCTTTCCTTGCAATGCTACTCGCTGATGATCCATTCTGCAACATCA

Nipponbare

TGTAGAGATTGTGACGAGGAGCAATGCAAATTTTCAGGTAGTGATGCGTCAGGCGCT  
TGCCCTCTTTCCTTGCAATGCTACTCGCTGATCCATTCTGCAACATCA

**M5-48k**

IRBB7

CTGTGTGAAAGTTCAGACGGATGGCGATTTTCGCAAAGATGTACTCCATTTGAGATCT  
TTATGTGTATGTATGTATACTTGTCAAGTCTGATGGAGGTCCAAAGAAATGGCAGTC  
TACTGATGCTGGAATGCAGTCTCATGTGCTCAAAGCAG

Nipponbare

CTGTGTGAAAGTTCAGACGGATGGCGATTTTGCAAAGATGTACTCCATTTGATATCT  
TTGTGTGTATACTTGCCAGGTCTGATGGAGGTCCAAAGAAATGGCAGTCTACTGATG  
CTGGAATACAGTCTCATGTGCTCAAAGCAG

**M5-72k**

IRBB7

TGGAAAGGAAGCTCCTCGACGGCGGCGTGGGCGGGCGCCGCGGGCGGCGGTACCATC  
TACGGCTGCCCCGGTGATGGTTCGACGTCGATCTCAACAAGTTCGAGCCATGGGACCTT  
CCTGGTAAGACCTA

Nipponbare

TGGAAAGGAAGCTCCTCGACGGCGGCGTGGGCGGGCGCCGCGGGCGGCGGGCGGC  
GGTCACCATCTACGGCTGCCCCGGTGATGGTTCGACGTCGATCTCAACAAGTTCGAGCC  
ATGGGACCTTCTGGTAAGACCTA

**RM20593**

IRBB7

AAGGTACACTTGCTCTGACGGTAGCAAAAGTTGATCATGCCCTACTTTAGCTGTAAC  
ATGAGACATGTCAGCATATGCTTACATGCATGAATCAGCAGGGCTACAGTTTTATTA  
TTTGCTTTGACAGCTTTCTCTCAACAATCATTCTCATTATATTTTTTATCCTAGGCTCC  
TTAGGAACATAGTAATTTTACAGGATTTTTGCTGAAATCGATCAGTTCAGTTCCCGC  
AAAATTCCACTGAAAATTAATCCTCTACTCCAAAGGCCTCTCTCTCTCTCTCTCTC  
TCACGTAGGATTTGCCACTGAGGTCT

Nipponbare

AAGGTACACTTGCTCTGACGGTAGCAAAAGTTGATCATGCCCTACTTTAGCTGTAAC  
ATGAGACATGTCAGCATATGCTTACATGCATGAATCAGCAGGGCTACAGTTTTATTA  
TTTGCTTTGACAGCTTTCTCTCAACAATCATTCTCATTATATTTTTTATCCTAGGCTCC  
TTAGGAACATAGTAATTTTACAGGATTTTTGCTGAAATCGATCAGTTCAGTTCCCGC  
AAAATTCCACTGAAAATTAATCCTCTACTCCAAAGGCCTCTCTCTCTCTCTCTCTC  
TCTCACGTAGGATTTGCCACTGAGGTCT

**RM3723F**

IRBB7

TAGACATGGGTCCCTCACAGATGGAACCCATTCTCATAGGCTCACATGTCAGCGGAC  
ACATATTCCTCTAACTTAGAGGAGCCTCCCCCTAATGAAAGTGTAATATAGGATCAG  
AAGCAAGACTTGTGGA

Nipponbare

TAGACATGGGTCCCTCACAGATGGAACCCATTCTCATAGGCTCACATGTCAGCGGAC  
ACATATTCACATATTCCTCTAACTTAGAGGAGCCTCCCCCTAATGAAAGTGTAATAT  
AGGATCAGAAGCAAGACTTGTGGA

**Supplemental Table 2. Oligonucleotides used in this study**

| Oligos              | Sequence (5' TO 3')                             | Usage                                                                 |                                                                    |
|---------------------|-------------------------------------------------|-----------------------------------------------------------------------|--------------------------------------------------------------------|
| RM7243F             | ACGAAGTTCCTTCACGGGTTG                           | Mapping                                                               |                                                                    |
| RM7243R             | AAGATGGCGTGCGTACGTAC                            |                                                                       |                                                                    |
| RM20571F            | GAGAGGTGGAGAGATGGATGTGG                         |                                                                       |                                                                    |
| RM20571R            | GACCAAAGAACCAAACCAAGAACC                        |                                                                       |                                                                    |
| RM5509F             | GATGATCCATGCTTTGGCC                             |                                                                       |                                                                    |
| RM5509R             | TTCCAGCAGAAAGAAGACGC                            |                                                                       |                                                                    |
| 5610F               | AAGCTCGTCACCTCACCCGTAC                          |                                                                       |                                                                    |
| 5610R               | TGCACAGTAGCAGCATATCTGCAG                        |                                                                       |                                                                    |
| M5-F                | GTTGTCCCACCGACTTTGCTA                           |                                                                       |                                                                    |
| M5-R                | CGATCTTACTGGCTCTGCAACTCT                        |                                                                       |                                                                    |
| M5-3kF              | CATATGTAGCAAGTATGCATCC                          |                                                                       |                                                                    |
| M5-3kR              | TCTGAAGACTAATGTGTTGGCT                          |                                                                       |                                                                    |
| M5-5kF              | TGTAGAGATTGTGACGAG                              |                                                                       |                                                                    |
| M5-5kR              | TGATCCATTCTGCAAC                                |                                                                       |                                                                    |
| M5-48kF             | CTGTGTGAAAGTTCAGACGG                            |                                                                       |                                                                    |
| M5-48kR             | CTGCTTTGAGCACATGAGAC                            |                                                                       |                                                                    |
| M5-72kF             | TGGAAAGGAAGCTCCTCGAC                            |                                                                       |                                                                    |
| M5-72kR             | TAGGTCTTACCAGGAAGGTC                            |                                                                       |                                                                    |
| RM20593F            | AAGGTACACTTGCTCTGACGGTAGC                       |                                                                       |                                                                    |
| RM20593R            | AGACCTCAGTGGCAAATCCTACG                         |                                                                       |                                                                    |
| RM3723F             | TAGACATGGGTCCCTCACAGATG                         |                                                                       |                                                                    |
| RM3723R             | TCCACAAGTCTTGCTTCTGATCC                         |                                                                       |                                                                    |
| 3628F               | TGTCCGGTGTCTCTAGCTTC                            |                                                                       |                                                                    |
| 3628R               | ACCAAGCTATACCAAGTACT                            |                                                                       |                                                                    |
| 5760-14kF           | CTCAACACTCCTCTTCACAG                            |                                                                       |                                                                    |
| 5760-14kR           | AGTGAGAGAAGCGTAGAGAC                            |                                                                       |                                                                    |
| RM53266F            | AGCCTTCCTAACCAATCTGG                            |                                                                       |                                                                    |
| RM53266R            | CCATCATTTTCGGCTCTTCAC                           |                                                                       |                                                                    |
| 3770F               | GTCACCAGTCACCACCGATC                            |                                                                       |                                                                    |
| 3770R               | CGTGATAACCGCGAGACATA                            |                                                                       |                                                                    |
| gRNA1-F             | GCAGGTACGTATACCAAGTTGTCCG                       |                                                                       | For the 1 <sup>st</sup> guide RNA to delete the 53 kb of Xa7 locus |
| gRNA1-R             | AAACCGGACAACCTGGTATACGTAC                       |                                                                       |                                                                    |
| gRNA2-F             | GCAGGTTTGTCCAATGAGTTGCTG                        |                                                                       | For the 2 <sup>nd</sup> guide RNA to delete the 53 kb of Xa7 locus |
| gRNA2-R             | AAACCAGCAACTCATTTGGACAAAC                       |                                                                       |                                                                    |
| gRNA3-F             | TGTTGGATGATCAGCGGCCGCCA                         |                                                                       | For guide RNA at the 1 <sup>st</sup> site of Xa7                   |
| gRNA3-R             | AAACTGGCGGCCGCTGATCATCC                         |                                                                       |                                                                    |
| gRNA4-F             | GTGTGAGGAAGACGCCGGAGTTGA                        |                                                                       | For guide RNA at the 2 <sup>nd</sup> site of Xa7                   |
| gRNA4-R             | AAACTCAACTCCGGCGTCTTCCTC                        |                                                                       |                                                                    |
| Xa7aRT-F            | CGTATGCCCCGTTGCAGTTGCAG                         | RT-PCR for Xa7 expression                                             |                                                                    |
| Xa7aRT-R            | CGGAGTTGACGGTCAGCAGTCG                          |                                                                       |                                                                    |
| Xa27L-F4,<br>112.5R | ATAGGCCGGTATCCCAGCTCT<br>ACTGGAGCAGAGGAATGTGC   | For genotyping Xa7 CRISPR plant                                       |                                                                    |
| EP53-F              | TGTAGAAACCATGTCTCATGC                           | For genotyping large deletion                                         |                                                                    |
| BTB-R1              | ACTACCACACCAGCCAGCAAG                           |                                                                       |                                                                    |
| EP53R               | CTTGGATGGAGCTCCAGATG                            | With EP53-F as internal primers for zygosity of large deletion plants |                                                                    |
| Pro2.7k<br>HindF    | TATGACCATGATTACGCCAAGCTTC<br>TCATCCAACCGTTCTG   | Amplify 2.7 kb Xa7 promoter                                           |                                                                    |
| Xa7aATG-R           | AGAAATTTACCCTCAGATCTACCAT<br>GGATGATGGATCCCCCAG |                                                                       |                                                                    |
| DeleBEF3            | ATACGAACGAAGGCTTTGAAGC                          | Delete 20 bp for mutant EBE                                           |                                                                    |

|          |                                                  |  |
|----------|--------------------------------------------------|--|
| DeleBER3 | TTCAAAGCCTTCGTTTCGTATGGGTT<br>ATATATTGGTTTTAGCAG |  |
|----------|--------------------------------------------------|--|

### Supplemental Information 1. The cDNA sequence of *Xa7*.

CCCCTTCCCAACCACAGCCAGCGGTTTCCAAACTCCACGCCTCGCTCAACCTGGGGGATCCATCATCCATGGCGGCC  
GCTGATCATCCTGATCGTATGCCCGTTGCGAGTTGCGAGGCTTGCGCCACCATTACGCCTTCCcTGCAAACCTTCGCC  
CGCCGCTCGACTGCTGACCGTCAACTCCGGCGTCTTCTCATCTCCACCGCCGGGGCCATCGTCCTCGTCCACACCG  
CCGGTAACCCACCCGCCATCGACAACGATCCAGCCTACGCCTTGGTCGCATTTCGTGCTCTTCTCCTCGGAATCTGG  
CTCATGTCTATTGCCCTCGTCGCCGACCAGTTCCcGCGCGCCGCTGGGGTGCCTGGCCATTGCCAGGGCGCTGCA  
GGATTACCTCATCGGTGGCAATTAAGTAGAAGCTTCGACCATGGCTCTGCACATTCcTCTGCTCCAGTTGTTCCCGG  
CTTCCCGTACGTGTGCCTGATGATTGTCTTTCTCTGTTTATTTGGCTAGTATTTTAGGCTTGGAAAGTTGAAAACTG  
TAAATCTGCTTCTTTTTCCCTCTGTACTACTACTAGACTTTCTTTTTTAAaGCTGACGTCATACACACAcCCCAGAT  
TCATAACGTGTCGTATAGTAAATGTATTTCGAGGCTTGTAAATAAAaAGGCACCCGTAGGTGTATGCTCTGTTTCAGTCT  
GATGTTCTAAATAATCAAGATACTATTAGTCGT

### Supplemental Information 2. gBlocks of *Xa7* homologous genes.

gBlock cloned into pBY02 at EcoRI-HindIII through Gibson cloning. Sequences shaded in yellow are overlapping regions to facilitate the insertion of gBlocks in pBY02 through Gibson cloning. The start and stop codons are in red. Sequences for EcoRI and HindIII are underlined. The Kozac sequence for optimal expression of gene under 35S promoter is in bold.

*Do\_Xa7* gBlock

GAGAACACGGGGGACTCTAGGAATTCGATCTACCATGGCGGACCGGCCGCGCAGCAATCCATCAGGGCCTGGCGCCGG  
TGGGCTTTGTGGTCCGGCAACAGCGAGCGATCGCCCCCTCGTCGCGCCCGACTCCTGATGATCAATTCCGGCACCCCTC  
CTGATCTCGGCCGCCTGGTCCGTCATCATCATCCACAGCACTTCATCAGGCACTACAGCCGGTGGTGGTCCGGCTTT  
CGCCCTCGTCACATTCCTCCTCTTCTTCTCGGCGTGTGCTGGTGATGGTGGCGCTTGTGCTTACAGGTTCCGGC  
GAGCGGCAGCGGTGCGCGTGGCCATTGCGAGGGCGCTCCGCCGCTACTTGCTCGGTCTTGGGTGGTAAGCTTCTAGA  
CTAGTGAGCTCGAAT

*Si\_Xa7* gBlock

GAGAACACGGGGGACTCTAGGAATTCGATCTACCATGGCGGGCCGGCCAGCAGAACTCCATCTCCAGCGAGTGATCG  
CAGGCCGCGGTGCGCGGCTCCTGGTCAACGCCGGCGCCCTGCTCATCTCGGCCGCGGGTCCGTATCATCCACGCC  
GCTGCCACGCCCTCTGACGCTTCTCTGGCCCGGCGCGCCGCTCATCGGTTTTGCATCTTCGTCTCCTCGGCGTGT  
GCTGGTGATGTGCGCGCTCGTCGCCGACCGGTTCCCAAGAGCGGCAAGGGCCGCGTGGCCATTGCGAGGGCACTCC  
AACGCTACGTGTTCCGTCTTGTGGGTGGTAAGCTTCTAGACTAGTGAGCTCGAAT

*Ph\_Xa7* gBlock. (codon optimized for *N. benthamiana* due to high GC of the original sequence)

GAGAACACGGGGGACTCTAGGAATTCGATCTACCATGGCCGGTCTCCAACCAGCAGCCATCCACCTTCAACGTAGAC  
AACAGGCTATTGCTGGTAGGCGAGTACGTCTCTTAGTAAACGCAGGAGCACTGTTGGTATCCGCAGGAGGCAGTGT  
GTTATCATTACGCAGCTACTCCTTCCAGACGACGCCGAGGAGGGCCCGCCTGCTCTCTGGTGGCCTTTTCTGTCTT  
TCTGCTGGGAGTCTCTTTAGTCACGCTGGCCTTAGCTGCTGATAGATTCCACGTCAGCAAGGGTTGGGGCCGCCG  
TAGCAACAGCTACTAATAGGTAATTTGTTGGACTCGGCTGGTAAAGCTTCTAGACTAGTGAGCTCGAAT

gBlock cloned into pBY02 at EcoRI-HindIII through Gibson cloning.

*Sb\_Xa7* gBlock (codon optimized for *N. benthamiana* due to high GC of the original sequence)

GAGAACACGGGGGACTCTAGGAATTCGATCTACCATGTCTCGACCCGCCGAGATGCGTAACCCCGTCACGCAGACG  
ATGGCGATTTGCAGTTAGCTTGGATTGGTAGAAGGCGAAGGGCCTTCAACAACAACCTCTGTTGGATTCCGGAGGC



AGGGCCTGCATGTTGTTAGGGGCTCTGGTCCTCACTTGGGATCAGCTCGCCCTCGCAAGTTCTTCCAGCCCCGAGCA  
TGTCCTGCTGGCTGCATTTGTTCTTTGGTTACTGGGGGCCGCCCTCGTGATGCTTAGTCTGGTAAGCCGAAGTTTC  
CAAGACTGGCATCCGCCGGTGCAGCCCTGGTAATGGCACTTAGGAATTATTTGTTAGGGGGTGGTGGGCTCTAAGCT  
TCTAGACTAGTGAGCTCGAAT

Op\_Xa7 gBlock

GAGAACACGGGGGACTCTAGGAATTCGATCTACCATGGTGAACCGGACAGCCGCTCATCCGCAGATGCCTGTTTCAGG  
CGCTGCGCCGCAATCGCATCGCGCAGGTAAACAGGGTGCCTCGCCGCTCGCCGTGCTCGAGCCCGACTGCTGATCGTC  
AACTCCGGCGTTTTCTCATCTCCACCTCCGGAGCCATCGTCGTCTCCACACCGCTGGAAACCCCTTCGCCCTCGT  
CGCATTCTGTCTCTTCTACTTGGCATCTGGCTCGTGCTTCTTGCCTCGTCGCCGACAAGTTCCCGCGAGCCGCCA  
GGTTCGCCGTGCCATTGCCAGTGCCTGCAGGATCACCTCATAGGCGGCAACTAGTAAGCTTCTAGACTAGTGAGC  
TCGAAT

O1\_Xa7 gBlock

GAGAACACGGGGGACTCTAGGAATTCGATCTACCATGGCGAATCGGACAGCTGCTCATCCGCGGATGCCCGTACAGG  
GGCTGCGCCGCAATCAAATCGCGCGGGGGCCCGCTCGCCGTTCTCGACTGCTGATCGTCAACACCGGCGTTTTTC  
CTCATCTCCACCTCCGGGGCCATCGTCGTCTCCACACCGCTGGAAACCCCTCCTCCGCCATCGACGACGGTCCGTC  
CTCCGCCCTCGTCGCATTCTGTCTCTTCTACTTGGCATCTGGCTCGTGCTTCTTGCCTCGTCGCCGACAAGTTCC  
CGCGAGCCGCCAGGGTGCCTCGCCATTGCTAGTGCCTGCAGGATCACCTCATAGGCGGCAACTAGTAAGCTTCT  
AGACTAGTGAGCTCGAAT

>O1\_XA7 KN541332.1\_FGP003 (*Oryza longistaminata*)

MANRRTAAHPRMPVQGLRRNQIARGPAARRSRLIVNTGVFLISTSGAIVVVHTAGNPSSAIDDG  
PSSALVAFVLFLLGIWLVLALVADKFPRAARVAVAIASALQDHLIGGN

>Op\_XA7 OPUNC06G22220 (*Oryza punctata*)

MVNRRTAAHPQMPVQALRRNRQAQVNRVPAARRARALLIVNSGVFLISTSGAIVVVHTAGNPF  
LVAFLVLFLLGIWLVLALVADKFPRAARVAVAIASALQDHLIGGN

>Do\_XA7 BAE44\_0010678 (*Dichantheium oligosanthes*) (NCBI accession: OEL28303.1)

MADRPAAIHQGLAPVGFVVRQQRRAIAPRRARLLMINSGLLISAAWSVIIHSTSSGTTAGGGR  
AFALVTFLFLLGVSLVMVALVAYRFRRAAVGVAIARALRRYLLGLGW

>Sl\_XA7 LOC105914264 (*Setaria italica*) (NCBI accession: XP\_012700797.1)

MAGRPAELHLQRVIAGRRARLLVNAGALLISAAGSVIIHAAATPSDASSGPAPPLIAFCIFVLG  
VSLVMSALVADRFPRARAGVAIARALQRYVFLVGLGW

>Ph\_XA7 LOC112891075 (*Panicum hallii*) (NCBI accession: XP\_025813762.1)

MAGLQPAAIHLQRRQQAIAARRVLLVNAGALLVSAGGSVVIHAAATPSDDAAGGPACSLVAFS  
VFLLGVSLVTLALAADRFPRARVGAATATNRYLFLGLGW

>Sb\_XA7 SORBI\_3K004400 (*Sorghum bicolor*) (NCBI accession: OQU75609.1)

MSRPAEMRNPRHADDGDLQLAWIGRRRRGLQQQLLLDSGGRACMLLGGALVLTWDQLALASSSSP  
EHVLLAAFLVLLGAALVMLSLVSRFPRLASAGAALVMALRNYLLGGGGL

## Supplemental File 1. Program for genome assembly.

```
####The script uses illumina reads downloaded form the 3K rice genomes project
#Raw sequence data is also available from the http://gigadb.org/dataset/200001 - SRA at
PRJEB6180
#deposited the reads in a new folder rice3k
## use the Xa7 region as reference and create an index using bowtie2
bowtie2-build complete_Xa7.fasta cXa7

##create an accession list from the reads_dictionary that contains the sample accession and the run
id
## sample_accession (1st collumn) run_accession (2dn collum) in reads_dictionary
for x in `cut -f 1 reads_dictionary`
do
grep $x reads_dictionary | sed 's/$//g' | cut -f 2 > copy_list
#####
    for i in `cat copy_list`
    do
    cp "/rice3k/"$i"_1.fastq.gz" ./
    cp "/rice3k/"$i"_2.fastq.gz" ./
    gunzip *.fastq.gz
    done
####
##generate temporary files to map
cat *_1.fastq > $x"_1.fq"
cat *_2.fastq > $x"_2.fq"
rm *_1.fastq
rm *_2.fastq
rm *.fastq.gz
####

bowtie2 -x cXa7 -1 $x"_1.fq" -2 $x"_2.fq" -S $x"_results.sam" -p 8
rm *.fq

samtools view -bS -o $x"_results.bam" $x"_results.sam"
rm $x"_results.sam"

samtools view -b -F 4 $x"_results.bam" > $x"_mapped.bam"
rm *_results.bam

samtools sort $x"_mapped.bam" -o $x"_results_mapped.sorted.bam"

rm $x"_mapped.bam"

samtools index $x"_results_mapped.sorted.bam"
#####
done
```

```
###Generate a consensus Xa7 for each mapped rice3k  
# sam_list is the list of bam files generate above
```

```
for x in `cat sam_list`  
do  
samtools mpileup -uf complete_Xa7.fasta "$x"_results_mapped.sorted.bam" | bcftools call -c |  
vcfutils.pl vcf2fq > "$x"_cns.fq"  
done
```

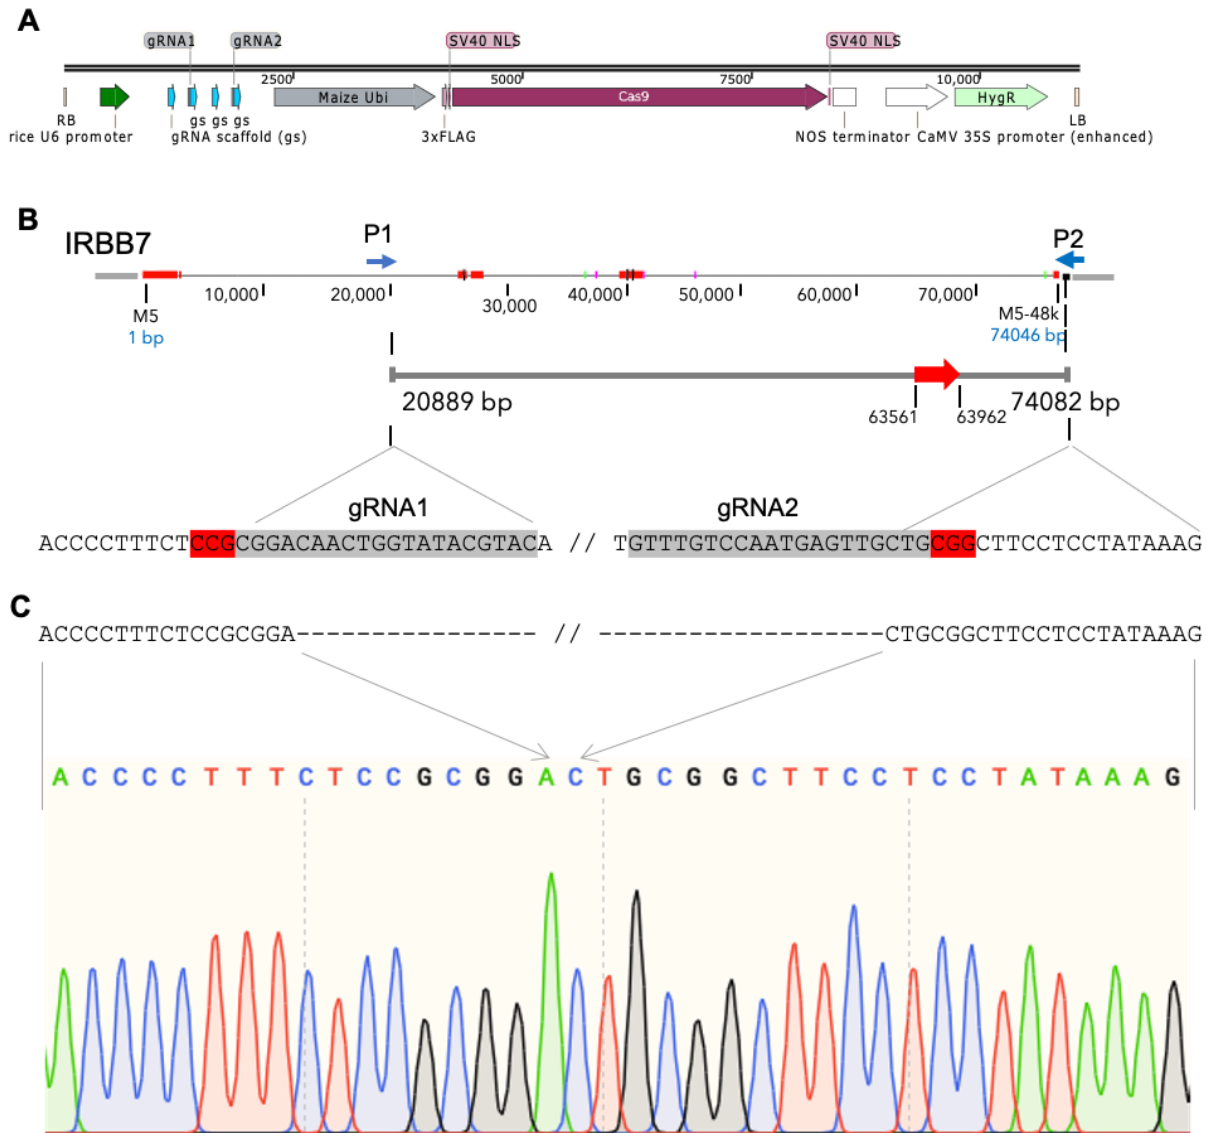

**Supplemental Figure 1.** Large chromosomal fragment deletion of *Xa7* locus.

(A) Schematic map of the CRISPR/Cas9 construct used for genome editing of *Xa7* locus. Guide RNA guides are under rice U6 promoters and Cas9 under maize ubiquitin 1 gene promoter. Hygromycin resistance gene is under the CaMV 35S promoter.

(B) *Xa7* locus delimited by two markers with guide RNA target sites. P1 and P2 are two deletion-specific primers to screen and identify the CRISPR-induced large deletion lines. Guide RNA target sites are in shaded with adjacent Cas9 PAM (protospacer adjacent motif) shaded in red.

(C) Sequencing chromatogram of PCR-amplicon from the T0 nb7-1 line. PCR-amplicon with two primers (P1 and P2) and genomic DNA of nb7-1 was subjected to Sanger sequencing.

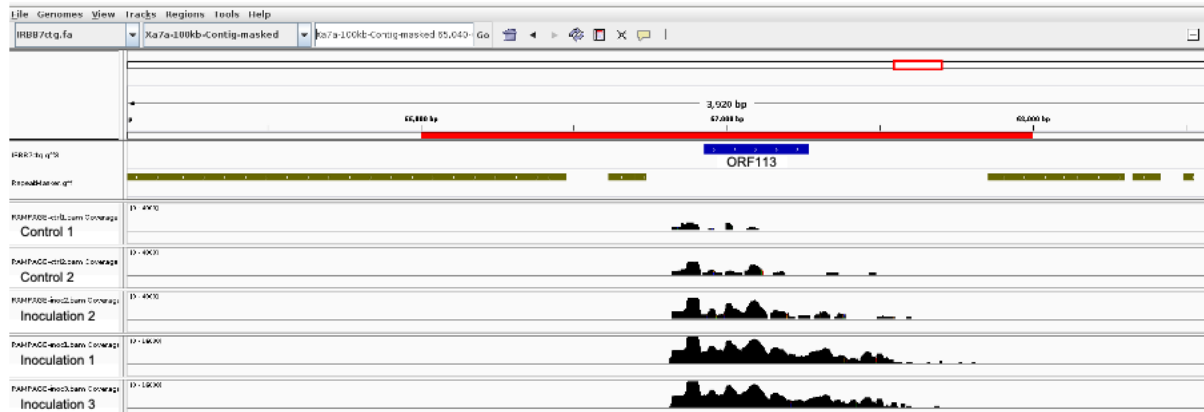

**Supplemental Figure 2.** Screenshot of RAMPAGE analysis displayed with the Integrative Genomics Viewer (Thorvaldsdóttir, Robinson et al. 2013).

RAMPAGE reads from two RNA samples derived from IRBB7 leaves inoculated with MX53 (Control 1 and 2) and three RNA samples (Inoculation 1, 2, and 3) derived from IRBB7 leaves inoculated with PXO86 were used for analysis. The tracks show read coverage per position. Note that Control 1 and 2 and Inoculation 2 coverage is shown on a scale 0-4000, compared to 0-16000 for Inoculation 1 and 3, in order to accommodate different library sizes (read pairs aligned are 7,021,714; 8,098,348; and 6,507,082 for Control 1 and 2 and Inoculation 2, respectively; compared to 32,296,182 and 37,344,426 for Inoculation 1 and 3, respectively); Alignment and analysis were done with GoRAMPAGE (<https://github.com/BrendelGroup/GoRAMPAGE>). Counts are displayed on a log scale. For example, site 66,859 has coverage 9 and 31 for Control, compared to 9144, 217, and 6100 for Inoculated.

Thorvaldsdóttir, H., J. T. Robinson and J. P. Mesirov (2013). "Integrative Genomics Viewer (IGV): high-performance genomics data visualization and exploration." *Brief Bioinform* **14**(2): 178-192.

**A**


```

MA--XAXXXXXXXXXXPAXXXXLXXXXXXXXXRRXXAXXXXXRARLLXVNSGXXLISXXGA/VXXHXAXXXX-XXX
Sb_XA7 MS-RPAEMRNPRHADDGDLQLAWIGRRRR-----GLQQQLLLDSGGRACMLL GALVLTWDQLALA-SSS 62
Ph_XA7 MA-----GLQPAAIH-----LQRRQQA IAGRRVRLL-VNAGALLVSAGGSVVIHAAATPSD-DAA 53
Si_XA7 MA-----G-RPAELH-----LQR---VIAGRRARLL-VNAGALLISAAGSVIIHAAATPSD--AS 48
Do_XA7 MA-----D-RPAAIHQGLAPVGFVVRQQRAIAPRRARLLMINSGLTLLISAASVSVIIHSTSSGT-TAG 61
Op_XA7 MVNRTAAHP-QMPVQ--ALRRNRIAQVNRVPAARRARARLLIVNSGVFLISTSGAIVVHTAGNPF---- 67
Ol_XA7 MANRTAAHP-RMPVQ--GLRRNQIA---RGPAAARRS--LLIVNTGVFLISTSGAIVVHTAGNPPSAID 62
XA7 MA--AADHPDRMPVAVAGLRHHYAF-----PANLRPAARLLTVNSGVFLISTAGAIVLVHTAGNPP-AID 62

```



```

XGPAALVAFVLFLLGXXLVX LALVADRFPRARVGVAVIAXALQXYLXGX-GX-
Sb_XA7 SPEHVLAAAFVLWLLGAALVMLSLVSRFPRLASAGAALVMALRNYLLGG-GGL 115
Ph_XA7 GGPACSLVAFSVFLLGVS LVT LALAADRFPRAARVGA AVATATNRYLFG L-GW- 105
Si_XA7 SGPARPLIAFCIFVLGVS LVM SALVADRFPRAARAGVAIARALQRYVFG L-VG- 101
Do_XA7 GGRAFALVTFLLFLLGVS LVM VALVAYRFRRAAAVGVAVIARALRRYLLGL-GW- 113
Op_XA7 -----ALVAFVLFLLGIWLVLLALVADKFPRAARVAVAIASALQDHLIG--GN- 109
Ol_XA7 DGPSSALVAFVLFLLGIWLVLLALVADKFPRAARVAVAIASALQDHLIG--GN- 113
XA7 NDPAYALVAFVLFLLGIW LMSIALVADQFPRAAGVAVAIARALQDYLIG--GN- 113

```

**B**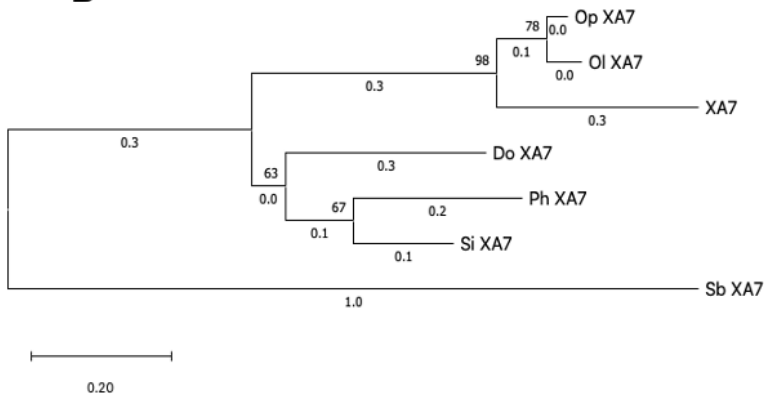**C**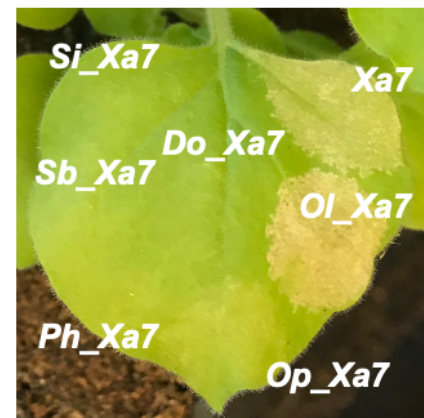

### Supplemental Figure 3. *Xa7* and homologs in diverse grass species.

(A) Amino acid alignment of seven *Xa7* homologs generated by ClustalX. Sequences are from *Do\_Xa7*, *Dichanthelium oligosanthes*; *Si\_Xa7*, *Setaria italica*; *Ph\_Xa7*, *Panicum hallii*; *Sb\_Xa7*, *Sorghum bicolor*; *Op\_Xa7*, *Oryza punctata*; *Ol\_Xa7*, *Oryza longistaminata*.

(B) Phylogenetic tree of seven *Xa7* homologs. The unrooted phylogenetic tree of 7 proteins was generated by using the Maximum Likelihood method and JTT matrix-based model. The tree with the highest log likelihood (-1290.17) is shown. The tree is drawn to scale, with branch lengths measured in the number of substitutions per site (next to the branches). The analyses were conducted in MEGA X (<http://www.megasoftware.net>).

(C) Cell death phenotypes caused by overexpression of *Xa7* and its homologs in *N. benthamiana* through agroinfiltration. Leaf image was taken three days post infiltration.
