# Supplementary material for: The Xa7 resistance gene guards the rice susceptibility gene SWEET14 against exploitation by the bacterial blight pathogen
Source: PubMed Central journal article supplement (PMC8132128; doi:10.1016/j.xplc.2021.100164), 2021-01-19
Supplement: mmc3.pdf [file mmc3.pdf]

# The *Xa7* resistance gene guards the rice susceptibility gene *SWEET14* against exploitation by the bacterial blight pathogen

Dangping Luo<sup>1</sup>, Jose C. Huguet-Tapia<sup>2</sup>, R. Taylor Raborn<sup>3,5</sup>, Frank F. White<sup>2</sup>, Volker P. Brendel<sup>3</sup> and Bing Yang<sup>1,4,\*</sup>

<sup>1</sup>Division of Plant Sciences, Bond Life Sciences Center, University of Missouri, Columbia, MO 65211, USA

<sup>2</sup>Department of Plant Pathology, University of Florida, Gainesville, FL 32611, USA

<sup>3</sup>Department of Biology, Department of Computer Science, Indiana University, Bloomington, IN 47405, USA

<sup>4</sup>Donald Danforth Plant Science Center, St. Louis, MO 63132, USA

<sup>5</sup>Current address: Bidesign Institute Center for Mechanisms of Evolution, Arizona State University, Tempe, AZ 85281, USA

\*Correspondence: Bing Yang ([yangbi@missouri.edu](mailto:yangbi@missouri.edu))

<https://doi.org/10.1016/j.xplc.2021.100164>

## ABSTRACT

Many plant disease resistance (*R*) genes function specifically in reaction to the presence of cognate effectors from a pathogen. *Xanthomonas oryzae* pathovar *oryzae* (*Xoo*) uses transcription activator-like effectors (TALEs) to target specific rice genes for expression, thereby promoting host susceptibility to bacterial blight. Here, we report the molecular characterization of *Xa7*, the cognate *R* gene to the TALEs *AvrXa7* and *PthXo3*, which target the rice major susceptibility gene *SWEET14*. *Xa7* was mapped to a unique 74-kb region. Gene expression analysis of the region revealed a candidate gene that contained a putative *AvrXa7* effector binding element (EBE) in its promoter and encoded a 113-amino-acid peptide of unknown function. Genome editing at the *Xa7* locus rendered the plants susceptible to *avrXa7*-carrying *Xoo* strains. Both *AvrXa7* and *PthXo3* activated a GUS reporter gene fused with the EBE-containing *Xa7* promoter in *Nicotiana benthamiana*. The EBE of *Xa7* is a close mimic of the EBE of *SWEET14* for TALE-induced disease susceptibility. Ectopic expression of *Xa7* triggers cell death in *N. benthamiana*. *Xa7* is prevalent in *indica* rice accessions from 3000 rice genomes. *Xa7* appears to be an adaptation that protects against pathogen exploitation of *SWEET14* and disease susceptibility.

**Keywords:** *Xa7*, TAL effector, *Xanthomonas*, bacterial blight, disease resistance, *SWEET14*

Luo D., Huguet-Tapia J.C., Raborn R.T., White F.F., Brendel V.P., and Yang B. (2021). The *Xa7* resistance gene guards the rice susceptibility gene *SWEET14* against exploitation by the bacterial blight pathogen. *Plant Comm.* 2, 100164.

## INTRODUCTION

Crop plants suffer detrimental effects from plant diseases and pests, which cause global yield losses of about 20% each year (Oerke 2006; Savary et al., 2019). To counteract disease, host plants have evolved innate immunity mechanisms that work against pathogens mainly through a diverse array of plant genes and gene products that recognize molecular signals from the pathogens (Spoel and Dong 2012). Conceptually, resistance is mediated by two general pathways. In the first pathway, membrane-bound receptors recognize conserved small molecules, often of pathogen origin, the so-called pathogen-associated molecular patterns, and trigger basal and broad immunity against the invading pathogens (Jones and Dangl 2006). Many host- and cultivar-specific pathogenic fungi and proteobacteria have evolved pro-

cesses that suppress basal immunity (Cook et al., 2015; Monteiro and Nishimura 2018). Plants, in turn, have evolved a second layer of defense, the so-called effector triggered immunity (ETI), which involves the specific recognition of immunity-suppressive effectors (Jones and Dangl 2006). Major resistance (*R*) genes are adaptive components of the plant defense system that arise from selective pressure exerted by virulent pathogen populations. In some cases, pathogens can overcome ETI through mutation or loss of *R* gene-specific effector genes or the acquisition of new effectors that, in turn, suppress ETI (Jackson et al., 1999; Feng and Zhou 2012).

Published by the Plant Communications Shanghai Editorial Office in association with Cell Press, an imprint of Elsevier Inc., on behalf of CSPB and CEMPS, CAS.

Bacterial blight (BB) of rice, caused by the  $\gamma$ -proteobacterium *Xanthomonas oryzae* pathovar *oryzae* (*Xoo*), is among the most damaging diseases in a wide range of South Asian rice-producing areas and also poses a threat in some African countries (Niño-Liu et al., 2006). *R* gene deployment is the most economically sound and environmentally friendly means to control BB, and many BB-specific *R* genes have been identified and characterized at the molecular level (Song et al., 1995; Yoshimura et al., 1998; Yang et al., 2000; Iyer and McCouch 2004; Sun et al., 2004; Gu et al., 2005; Chu et al., 2006; Xiang et al., 2006; Liu et al., 2011; Tian et al., 2014; Wang et al., 2015; Hu et al., 2017; Ji et al., 2020; Zhang et al., 2020). The cognate effectors that recognize *R* genes, as in other proteobacterial disease complexes, are commonly effectors of the type III secretion pathway. Historically, type III effectors with a cognate *R* gene are named Avr effectors (Leach and White 1996). All the known cognate type III Avr effector/*R* gene pairs in BB involve a subset of type III effectors known as transcription activator-like effectors (TALs).

TALs of *Xanthomonas* represent the largest subgroup of type III effector proteins in plant pathogenic bacteria. For the most part, they function as transcription factors that promote the expression of host genes by binding to sequence-specific promoter segments, referred to here as effector binding elements (EBEs). Consequentially, expression of the host susceptibility (*S*) gene enhances the disease process. TALs of *Xoo* that have a dramatic effect on virulence and host susceptibility are referred to as major TALs and are known to target three members of the sucrose transporter, or SWEET, gene family. In the absence of SWEET gene expression, *Xoo* strains are virtually nonpathogenic, and every *Xoo* strain examined to date has at least one gene for a major TALE (Oliva et al., 2019). Rice cultivars have adapted to TALE-mediated virulence by the acquisition of a genetically dominant *R* gene class defined by TALE-specific expression that triggers a state of resistance. Rice *R* genes with TALE-specific expression include *Xa27*, *Xa10*, and *Xa23* (Gu et al., 2005; Tian et al., 2014; Wang et al., 2015). TALE-mediated *R* gene expression has also been demonstrated for *Bs3* and *Bs4C-R* in pepper (*Capsicum* sp.) (Römer et al., 2009; Strauss et al., 2012).

*Xa7* is a dominant *R* gene of rice that confers resistance to *Xoo* strains that harbor the cognate major TALE AvrXa7 (Hopkins et al., 1992). The AvrXa7 effector has a dual function: as a virulence factor, it induces the rice *S* gene *SWEET14*, which encodes a sucrose efflux transporter, and as an avirulence factor, it also triggers *Xa7*-mediated resistance. AvrXa7 targets an overlapping EBE of the *S* gene *SWEET14* with a second major TALE, PthXo3. Although the identity and mechanism of *Xa7* are unknown, it has been shown to confer resistance to all six Japanese *Xoo* races or sub-races and 4 of 10 Philippine *Xoo* races (Ogawa et al., 1991). *Xoo* races are defined by the set of *R* genes in a given group of rice cultivars with which the strains are incompatible. The broad spectrum of *Xa7* makes it an important *R* gene in rice breeding programs (Ogawa et al., 1991; Hsu et al., 2020). The pathogen gene *avrXa7* was found in 11 of 33 fully sequenced Asian *Xoo* strains, whereas *pthXo3* was found in 12 of the 33 strains. No strain contained both *avrXa7* and *pthXo3* (Oliva et al., 2019). *Xa7* has been found to retain effectiveness under field conditions (Bai et al., 2000) and to perform better at high temperatures (Webb et al., 2010; Dossa et al., 2020), which are reported to

compromise the function of some *R* genes. Efforts to map *Xa7* have placed the gene on chromosome 6 (Kaji and Ogawa 1995; Porter et al., 2003; Chen et al., 2008; Zhang et al., 2009). In this study, we present evidence for the identity of *Xa7* based on fine mapping, gene expression assays, and CRISPR-mediated gene editing.

## RESULTS

### Fine mapping of *Xa7* from IRBB7

To fine map *Xa7* in IRBB7 (an *indica* rice variety carrying *Xa7*), the first mapping population was created by crossing the near-isogenic line IRBB7 with the recurrent parental cultivar IR24 (Ogawa et al., 1991). For mapping, 220 F2 plants were phenotyped by inoculation with the *avrXa7*-carrying *Xoo* strain PXO86, and genotyped using the previously reported *Xa7*-linked marker M5 (Porter et al., 2003). A set of 10 newly developed molecular markers linked to M5 were also identified and used to further genotype the plants (see Supplemental Table 1 for markers and Supplemental Table 2 for oligonucleotides). *Xa7* was mapped to an interval defined by the markers RM7243 (three recombinants) and RM20593 (two recombinants) and was shown to co-segregate with the markers M5, M5-5k, and M5-48k (Figure 1A). These results indicate that *Xa7* is located within a region of 512 kilobases (kb) between RM7243 and RM20593 relative to the reference genome of the cultivar Nipponbare. An additional 17 000 members from an F2 population of IRBB7 and Nipponbare were screened for recombinants between RM7243 and RM20593, and the recombinants were phenotyped for genetic association analysis. Based on a number of polymorphic markers (Supplemental Table 1), *Xa7* was shown to reside within a region corresponding to the 41.3-kb region between M5 and M5-48k on the Nipponbare reference genome (Figure 1B).

Short and long sequencing reads obtained from IRBB7 DNA by Illumina and Nanopore sequencing were used for *de novo* assembly of the *Xa7* region across markers M5 and M5-48k, resulting in a genomic sequence of 74 kb. PCR amplification and sequencing of the amplicons were also performed to validate the accuracy of the sequencing data, and the sequence was aligned with the related region from Nipponbare (Figure 1B). The regions are syntenic and include homologous genes that encode the IRGSP GenBank protein accessions XP\_025882165.1 (only the 402 amino acid [aa] C-terminal exon is conserved in IRBB7), XP\_015642179.1 (not present in IRBB7), XP\_015644250.1 (perfectly conserved), and XP\_015641982.1 (perfectly conserved). All proteins are annotated as “uncharacterized.” XP\_015641982.1 contains a common protein–protein interaction motif of about 100 aa, known as the BTB/POZ domain. The IRBB7 contig has a GC content of approximately 45%, and about 62% of the sequence matches transposable elements as determined by RepeatMasker (version open-4.0, <http://www.repeatmasker.org>) using the RITE database (Copetti et al., 2015).

### Deletion of the *Xa7* region

To further confirm the location of *Xa7*, a line named NB7, which was derived from an IRBB7 and Nipponbare cross and is resistant to PXO86, was used to delete 53 kb of the IRBB7 *Xa7* region using CRISPR-Cas9 with two guide RNAs (Figure 1B, gRNA1 and

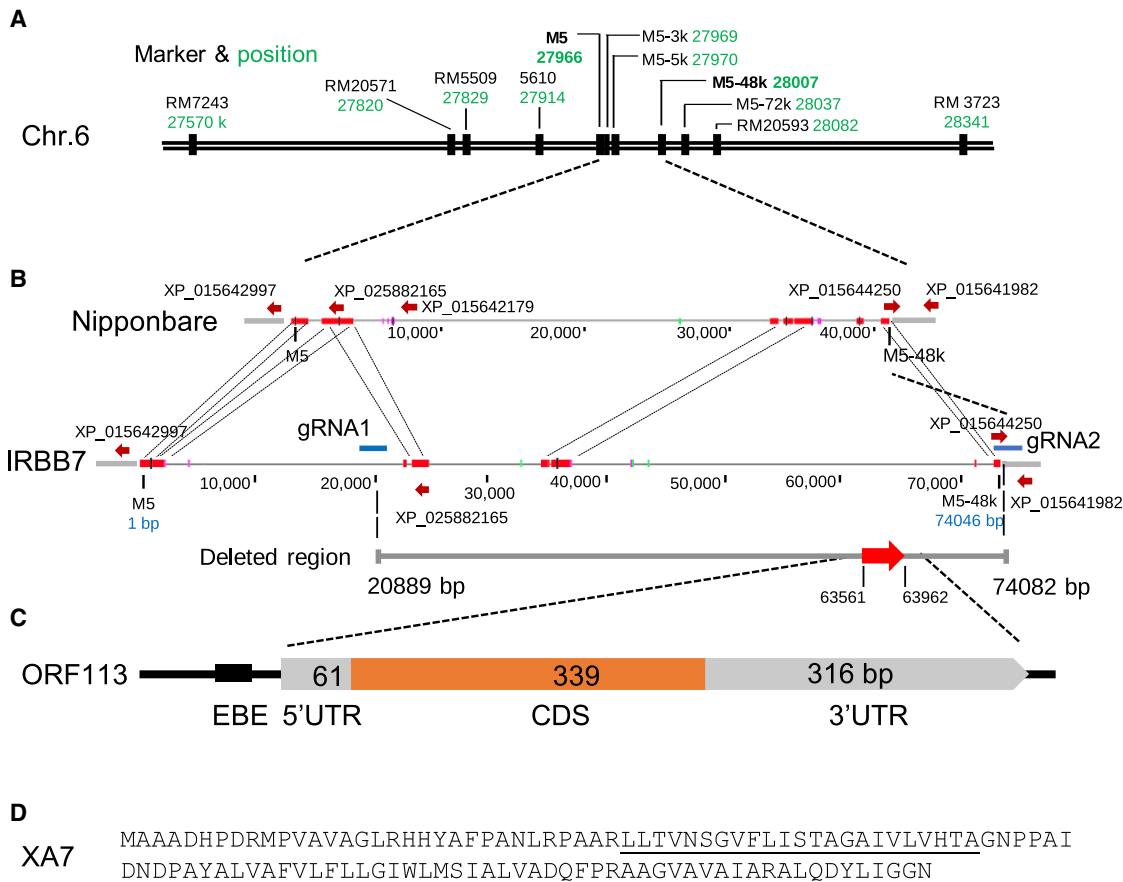

**Figure 1. Fine mapping of Xa7.**

**(A)** Physical map of Xa7 locus and associated markers on chromosome 6. The individual molecular markers are indicated as the genomic coordinates (in kilobases and in green) on chromosome 6 of the Nipponbare reference genome.

**(B)** Genomic regions delimited by two markers (M5 and M5-48k) in Nipponbare and IRBB7. Annotated genes in Nipponbare are shown with red arrows, and those in IRBB7 are shown in blue. Red bars linking Nipponbare and IRBB7 indicate syntenic regions. Two Cas9 guide RNAs for the deletion of a 53-kb region within the Xa7 candidate gene in IRBB7 are denoted by red arrows.

**(C)** Schematic graph of Xa7. The gene structure is depicted as EBE for AvrXa7, 5' UTR for the 5' untranslated region, and 3' UTR for the 3' untranslated region. CDS, coding sequence. **(D)** XA7 amino acids. Single letters of amino acids are used. The transmembrane sequences are underlined.

gRNA2). NB7 is transformable due to its Nipponbare genetic background. PCR with deletion-specific and internal primers showed that one transgenic line, nb7-1, contained a large 53-kb deletion delimited by the two guide RNAs in one of its chromosomal copies (Supplemental Figure 1; see Supplemental Table 2 for oligonucleotide information). The nb7-1 line was resistant to disease after inoculation with Xoo strain PXO86, indicating that it retained a copy of Xa7 and was heterozygous for the deletion. Susceptibility was shown to co-segregate with the homozygous deletion in the T1 population ( $n = 5/24$ ) using primers that could detect the wild-type and deleted regions (Figure 2).

### Gene expression from the Xa7 region

We hypothesized that Xa7 could be distinguished from the other annotated genes in the 53-kb region based on its TALE-mediated expression. RNA samples from IRBB7 infected with PXO86 and the *avrXa7* mutant MX53 were subjected to RAMPAGE analysis, which combines RNA annotation and mapping of the respective promoters (Batut and Gingeras 2013; Raborn and Brendel 2019). The transcription start site (TSS)-adjacent sequences of

transcribed genes in the unique 53-kb region were captured, and the RAMPAGE reads were used to project the transcript abundance of individual genes in the two treatments (with and without *avrXa7*). We used the Bioconductor TSRchitect package (Raborn et al., 2017) to identify transcription start regions (TSRs) in the contig, and the edgeR package (Robinson et al., 2010; McCarthy et al., 2012) to assess differential expression. Only one strongly induced TSR was found in the 53-kb region, in positions 63 494–63 513 (predominant TSS at 63 503; Figure 1), and it showed a 147-fold increase in expression after treatment with PXO86 relative to MX53 (Supplemental Figure 2). We refer to this transcript as *R-Xa7* (Figure 1B, red arrow).

Sixty-eight base pairs downstream of the predominant *R-Xa7* TSS site is an open reading frame (ORF) of 342 bp (including the stop codon) designated ORF113. A 726-bp cDNA, encompassing ORF113, a 68-bp 5' UTR, and a 316-bp 3' UTR, was isolated by screening a cDNA library derived from IRBB7 infected with PXO86 (Figure 1C, Supplemental Information 1). ORF113 was predicted to encode a small protein of 113 aa that showed no

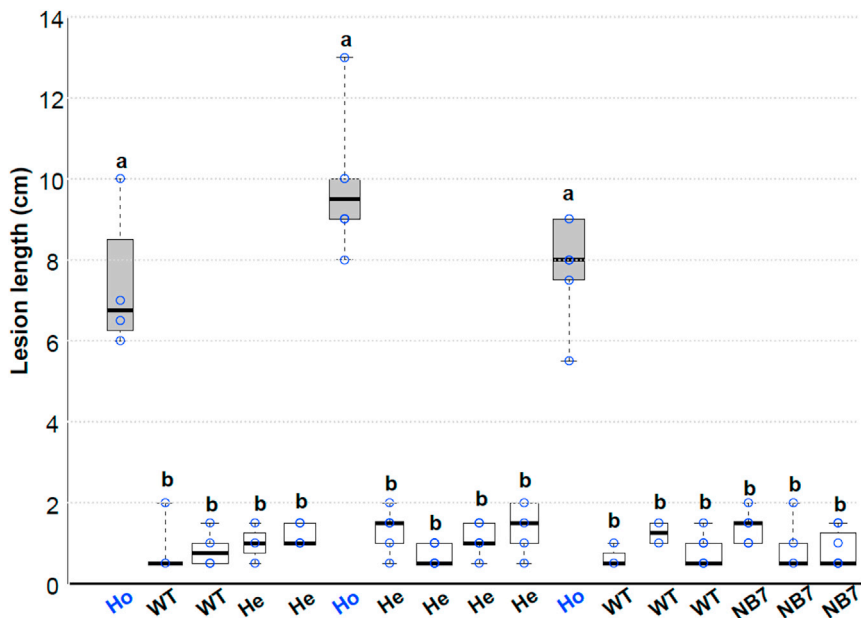

**Figure 2. Disease phenotypes of progeny from the NB7 CRISPR T0 line.**

Individual plants with genotypes homozygous (Ho) and heterozygous (He) for the 53-kb deletion and wild-type (WT) plants were inoculated with PXO86. Lesion lengths were measured 12 days after inoculation on three to five leaves of individual plants. Individual segregants were genotyped for the presence or absence of the 53-kb chromosomal fragment deletion by PCR. Ho, segregants homozygous for the 53-kb deletion; He, segregants heterozygous for the 53-kb deletion; WT, progeny homozygous for the WT genotype; NB7, the parent *Xa7* isogenic line. Center lines show the medians; box limits indicate the 25th and 75th percentiles as determined by R software; whiskers extend to the minimum and maximum values; box width is proportional to the square root of the sample size; and data points are plotted as open circles.  $n = 3$  to 8 sample points. Treatments with the same lowercase letter are not significantly different at  $p < 0.05$ .

significant similarity to known R proteins in the database (Figure 1D). The gene from IRBB7 is hereafter tentatively referred to as *Xa7*.

To corroborate its involvement in *Xa7*-mediated resistance, two sites in *Xa7* were targeted by CRISPR in NB7. Two CRISPR target sites in *Xa7* were chosen to construct two guide RNAs for the transformation of NB7 (Figure 3A, gRNA3 and gRNA4). Sequence analysis of 15 T0 transgenic plants revealed three independent T0 plants in which both alleles were knocked out:  $xa7^{cr-1}$ ,  $xa7^{cr-2}$ , and  $xa7^{cr-3}$ . The mutations (1-bp deletion) at the first guide RNA target in  $xa7^{cr-1}$  led to a premature stop codon; the mutations (79-bp deletion) in  $xa7^{cr-2}$  also led to a premature stop codon in *Xa7*; and the two alleles in  $xa7^{cr-3}$  also led to two null mutations in *Xa7* (Figure 3A and 3B). All three altered lines were susceptible to PXO86, indicating that *Xa7*-mediated resistance to PXO86 requires functional *Xa7* (Figure 3C).

To identify the putative EBE for *AvrXa7* in *Xa7* (designated  $EBE_{AvrXa7}$ ), the sequence upstream of the *Xa7* cDNA was analyzed by the EBE prediction programs TALVEZ and TALE-NT (Doyle et al., 2012; Booher and Bogdanove 2014). Both programs predicted consensus sequences of 26 nucleotides for *AvrXa7* and 29 nucleotides for *PthXo3* located 134–109 and 136–107 bp upstream of the *Xa7* ATG that exhibited the DNA binding specificity predicted for the repeat regions of *AvrXa7* and *PthXo3*, respectively (Figure 4A). The EBEs of *Xa7* for *AvrXa7* and *PthXo3* are similar to the corresponding EBEs of *SWEET14* (Figure 4A), and their predicted binding scores are comparable to those of the previously characterized overlapping *SWEET14* EBEs for *AvrXa7* and *PthXo3* (Figure 4B) (Antony et al., 2010).

#### AvrXa7 and PthXo3 induce *Xa7* expression in an $EBE_{AvrXa7}$ -dependent manner

To examine the expression of *Xa7* in response to *Xoo* inoculation, qRT-PCR was performed using RNA extracted from inoculated

rice leaf tissue and specific primers in *Xa7* after inoculation with *Xoo* strains that varied in major TALE gene content. The strain ME2 is a mutant of PXO99<sup>A</sup> that has no major TALE gene (Yang and White 2004). Individual major TALE genes were introduced into ME2, and these strains were inoculated on IRBB7. *Xa7* was induced after inoculation with ME2(*avrXa7*) and ME2(*pthXo3*) (Figure 5A). Expression was not observed after inoculation with ME2(*pthXo1*) or ME2, indicating that *Xa7* induction is specific to *AvrXa7* and *PthXo3* (Figure 5A). TALE-dependent *Xa7* promoter activity was assayed by transient expression using a  $\beta$ -glucuronidase (GUS) reporter in *Nicotiana benthamiana*. A 2.7-kb fragment upstream of the ATG of *Xa7* was ligated with the GUS reporter gene (Figure 5B), and the construct (labeled EBE) was co-transferred with CaMV 35S-driven *avrXa7* into *N. benthamiana* leaf cells by agroinfiltration (Figure 5C). Similarly, the reporter construct was co-delivered with *pthXo1* or *pthXo3*. Sites inoculated with *avrXa7* and *pthXo3* displayed high GUS activity (Figure 5C), whereas sites inoculated with the GUS reporter construct (EBE), an empty construct, or 35S-driven *pthXo1* displayed very low GUS activity. When a promoter containing a mutated EBE (labeled mEBE with a 20-bp deletion) was used, GUS activity with *avrXa7* was reduced (Figure 5C).

#### Ectopic expression of *Xa7* induces cell death in *N. benthamiana*

Although all the TALE-dependent executor R proteins of rice share some amino acid identities, it is unclear whether the proteins are phylogenetically related, with the exception of *XA10* and *XA23* (Figure 6A). Ectopic expression of *Xa10* and *Xa23* triggers cell death in *N. benthamiana* (Tian et al., 2014; Wang et al., 2015), but the effect of *Xa27* and *Xa7* is unknown. To investigate whether *Xa7* can function in *N. benthamiana*, the 35S promoter (35S) was placed immediately upstream of the translation start codon of the *Xa7*, *Xa10*, *Xa23*, and *Xa27* ORFs, and each construct was delivered into *N. benthamiana* leaves by agroinfection. A weak HR (hypersensitive response) for *Xa7*, *Xa10*, and *Xa23* was visible at 16 h after infiltration, and HR was

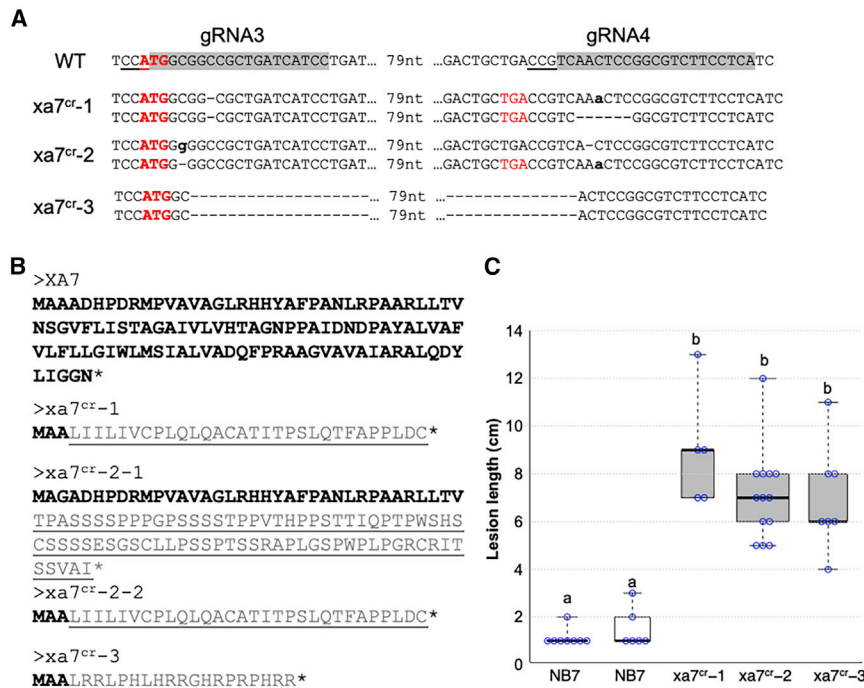

**Figure 3. Disease phenotypes of Xa7 mutant lines.**

**(A)** Genotypes of three CRISPR lines with deletions and insertions at two guide RNA target sites. Guide RNA target sequences are shaded, and the adjacent Cas9 PAM sequences are underlined. Start codons are in red and bold, and stop codons are in red. Inserted nucleotides are in bold lowercase letters, and dashed lines indicate deleted nucleotides.

**(B)** Genotypes of three CRISPR lines with Xa7 knocked out. Predicted amino acids encoded by different alleles are shown, with WT sequences in bold and new amino acids due to frameshift mutations underlined.

**(C)** The isogenic line NB7 and three CRISPR lines containing Xa7 knockout mutations were inoculated with PXO86. Lesion lengths were measured as for Figure 2. Treatments with the same lowercase letter are not significantly different as for  $p < 0.05$ .

pronounced at 48 h after infiltration, although the degree of cell death induced by Xa7 appeared lower than that induced by Xa10 and Xa23 (Figure 6B). No visible HR occurred after the transient expression of Xa27 (Figure 6B).

### Spectrum of Xa7 resistance against various Xoo strains

We next examined the spectrum of Xa7 resistance against all known major TALE genes and representative Xoo strains. Six major TALE genes (*avrXa7*, *pthXo1*, *pthXo2*, *pthXo3*, *TalC*, and *TalF*) that target three cognate SWEET-related S genes in rice were transferred into ME2. ME2 is not pathogenic in either IR24 or IRBB7 due to loss of the endogenous copy of *pthXo1* and the resulting inability to induce any SWEET gene. Individual ME2 complementation strains carrying *avrXa7* and *pthXo3* caused susceptibility in IR24 and resistance in IRBB7, whereas the other four TALE genes in ME2 caused susceptibility in both IR24 and IRBB7, indicating that Xa7 is specific to *avrXa7* and *pthXo3* (Figure 7). Seven representative field isolates of Xoo are known to carry *avrXa7* or *pthXo3* or lack either gene (Oliva et al., 2019). Only isolates carrying *avrXa7* or *pthXo3* triggered resistance (Figure 7). ME2(*pthXo3*) resulted in an incompatible interaction, and PXO61, which contains *pthXo3*, was scored as moderately susceptible in comparison to the PXO99 and PXO86 reactions. IRBB7 has been scored as moderately susceptible to resistant to PXO61 in previous tests (Institute 2006).

### Prevalence of Xa7 locus in other species and rice cultivars

Xa7 homologs have been identified in other species. Homologs exist in wild rice species (*O. punctata* and *O. longistaminata*), sorghum, *Setaria*, and panicgrasses (*P. hallii* and *D. oligoanthes*). The C termini of XA7 homologs are more conserved than the N termini (Supplemental Figure 3A and 3B). To determine whether representative genes could cause cell death in *N. benthamiana*, the coding sequences of six homologous genes were each

constructed under the control of the 35S promoter and expressed ectopically by agroinfiltration of *N. benthamiana* (Supplemental Information 1). Among these constructs, only *OI\_Xa7* resulted in an HR at 48 h. *Op\_Xa7* appeared to cause a weak cell death response compared with that of Xa7 (Supplemental Figure 3C). No obvious cell death phenotype was observed with the remaining homologs (Supplemental Figure 3C).

A total of 294 accessions from a scan of 3000 rice genome sequences contained Xa7 coding sequences (Supplemental Data 1). A 3171-bp region of the IRBB7 Xa7 locus, including 842 bp upstream and 2014 bp downstream of the Xa7 coding sequence, was used as the reference to assemble reads from these 294 accessions, generating 294 contigs that contained Xa7 and its flanking sequences. Due to the lower sequencing coverage of some accessions and the limitations of next generation sequencing technology to reveal 13 consecutive Cs, only nine contigs contained the Xa7 EBEs for *AvrXa7* and *PthXo3*. The EBEs could not be unambiguously identified in the majority of contigs (Supplemental Data 1).

Among the 294 accessions, the majority ( $n = 185$ , 63%) are *indica*, 72 are *japonica* (24%), 22 are Aus/boro, 14 are Basmati/sadri, and seven are intermediate types (Supplemental Data 1). Geographically, India has the most accessions ( $n = 58$ ), followed by China ( $n = 41$ ), Bangladesh ( $n = 34$ ), Indonesia ( $n = 26$ ), the Philippines ( $n = 22$ ), and Cambodia ( $n = 19$ ) (Supplemental Data 1).

## DISCUSSION

Xa7 has mysteriously evaded cloning endeavors for the past 20 years. Here, multiple approaches provide evidence that our postulated candidate gene is indeed the cognate R gene for the TALE *AvrXa7*. Three critical observations are that (1) the gene lies within the region of markers previously associated with the Xa7 locus; (2) the deletion of the region and specific mutations in ORF113 eliminate Xa7-mediated resistance; and (3) the gene

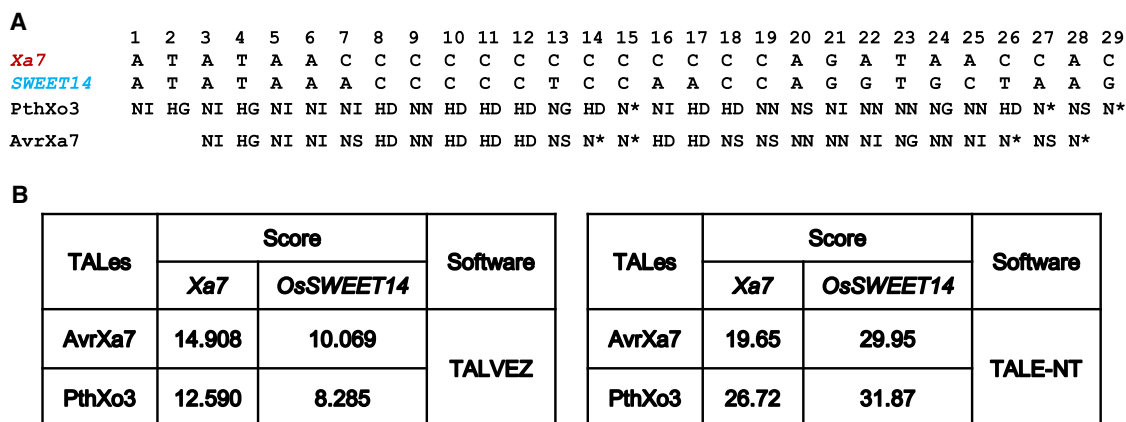

**Figure 4. AvrXa7 and PthXo3 are predicted to target two overlapping EBEs in Xa7.**

(A) Individual RVDs of the AvrXa7 and PthXo3 central repeats match single nucleotides of the predicted EBE regions in the Xa7 promoter. Single letters are used for amino acids at the 12th and 13th positions of individual repeats. \* The missing amino acid at the 13th position of a particular repeat. The EBE regions for AvrXa7 and PthXo3 in the S gene SWEET14 are shown for comparison.

(B) The scores of matches between the DNA sequences of putative Xa7 and SWEET14 (as controls) and the repeats of AvrXa7 and PthXo3 as predicted by two programs (TALE-NT and TALVEZ). A lower score indicates a higher binding affinity between the RVDs and the target sequence.

is expressed in an AvrXa7-dependent manner upon infection. That the AvrXa7-mediated expression of Xa7 is directed by a sequence-specific element in its promoter was corroborated by transient expression assays in *N. benthamiana* leaves. The GUS fusion was not expressed in the absence of AvrXa7 or another TALE (PthXo1) that has an alternate binding specificity. Disruption of the EBE by a 20-bp deletion also interfered with AvrXa7-dependent transient expression. The experiments also revealed that the TALE PthXo3 functions as an allele of AvrXa7 and directs Xa7-mediated resistance. The PthXo3-dependent activity of Xa7 explains its relatively broad activity against extant Asian strains of Xoo. The gene for PthXo3 was originally cloned from PXO61, a strain isolated in the Philippines. IRBB7 has been scored variously as moderately susceptible (or resistant) to resistant to PXO61 (Ogawa et al., 1991; Lee et al., 2003; Zhang et al., 2009; Xu et al., 2012). Here, we demonstrate that a variety of strains carrying the endogenous and transferred *pthXo3* are associated with Xa7-mediated resistance. Genes for AvrXa7 and PthXo3 are found in many extant strains of Xoo (Oliva et al., 2019). Identification of Xa7 not only advances our understanding of molecular and genetic mechanisms of disease resistance but also facilitates the marker-assisted breeding of Xa7 into elite rice cultivars for broad resistance.

Cloning of Xa7 increases the number of executor *R* genes to four (Xa10, Xa23, Xa27, and Xa7). These genes form a group of unique *R* genes in rice and can be further divided into three subgroups with Xa10 and Xa23 in one group and Xa27 and Xa7 as single members of two additional groups. Xa27 has four Xa27-like genes (Os06g39810, Os06g07150, Os06g39800, and Os06g39860) in Nipponbare alone (Li et al., 2013). Xa10/Xa23 has two homologous genes (Os11g37620 and Os11g37570) in the Nipponbare genome (Wang et al., 2017). There is only one Xa7 homolog (Os11g26900) in the Nipponbare genome, and the two share 57% identity at the amino acid level. No evidence has been found to indicate that the TALE-induced *R* genes serve any purpose other than disease resistance. Conversely, the cognate TALE genes *avrXa10* (for Xa10), *avrXa23* (for Xa23), and *avrXa27*

(Xa27) lack a detectable virulence contribution to their respective Xoo isolates. AvrXa7 and PthXo3, on the other hand, are major virulence determinants for their respective Xoo isolates (Yang et al., 2000; Yang and White 2004). Inactivation of the corresponding genes, *avrXa7* or *pthXo3*, renders these isolates almost nonpathogenic (Hopkins et al., 1992; Yang and White 2004). The alteration of such virulence TALEs to evade recognition by cognate *R* genes imposes a physiological and ecological fitness penalty on Xoo strains due, in this case, to the loss of elevated SWEET14 expression. Xa7 is thus far unique in that its EBE mimics that of the S gene, guarding against pathogen exploitation of SWEET14 in healthy cells by triggering the death of infected cells that are injected with either of the two major TALEs.

Several examples show that the transient overexpression of executor *R* genes in *N. benthamiana* can induce cell death, which may mimic the HR phenotype in the host plant/microbe interaction (Romer et al., 2009; Strauss et al., 2012; Tian et al., 2014; Wang et al., 2015; Wang et al., 2017; Wang et al., 2018). In this study, we compared the ability of four executor genes cloned from rice to induce cell death in *N. benthamiana*. The appearance of the HR showed that Xa7 has a moderate ability to induce cell death relative to Xa10 and Xa23, both of which trigger cell death much more rapidly and strongly. No visible cell death was observed in *N. benthamiana* when Xa27 was overexpressed (Figure 6B) (Tian et al., 2014). Xa27 was reported as an *R* gene that triggered a strong HR in response to AvrXa27 in rice (Gu et al., 2005), and Xa27-like genes activated by designer TALEs that targeted the promoters of Xa27-like genes also mediated strong HR in rice (Li et al., 2013). Together with the observation of the diverse abilities of six Xa7 homologs to induce cell death in *N. benthamiana*, our results therefore show that the mechanism of cell death induction in *N. benthamiana* may differ from the HR triggered in rice by the corresponding avirulence TALE gene.

All four executor *R* genes in rice encode small proteins: XA27, XA23, and XA7 consist of 113 aa, and XA10 consists of 126 aa

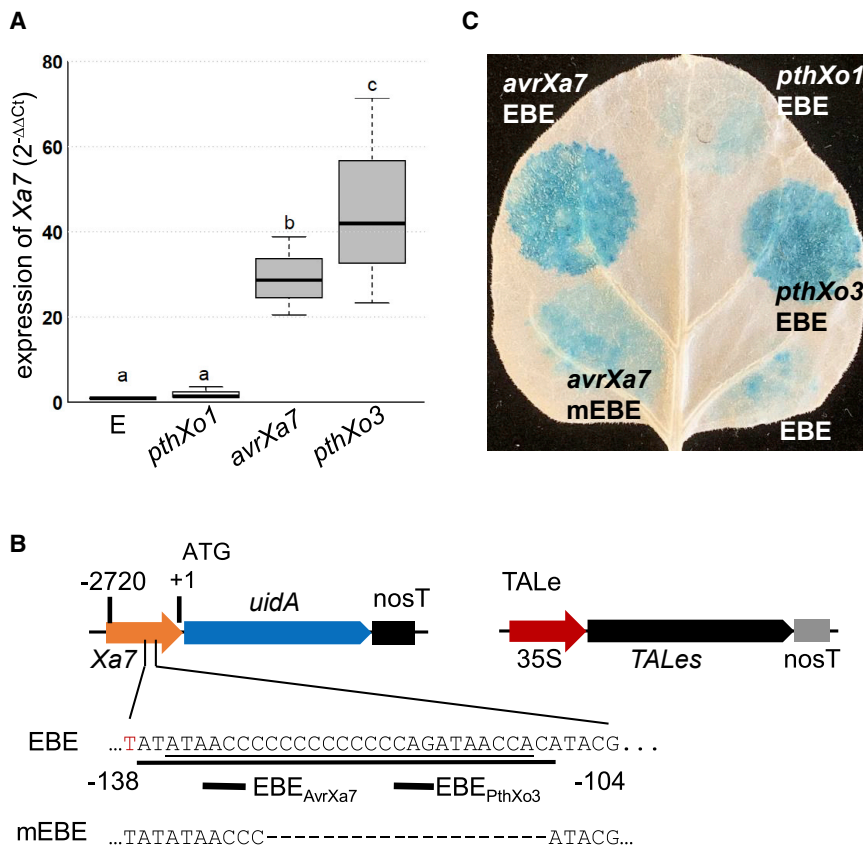

**Figure 5. Transient assay of interactions between TALs and a reporter gene fused with the promoter elements of Xa7.**

**(A)** Induction of the Xa7 candidate gene in IRBB7 by ME2 carrying different TALe genes as revealed by qRT-PCR.

**(B)** Constructs of the β-glucuronidase (GUS) gene fused with a promoter fragment (EBE) or a mutated element (mEBE) and of TALe genes under the 35S promoter.

**(C)** GUS staining of *N. benthamiana* leaf infiltrated with *Agrobacterium* strains containing different constructs from **(A)**. The leaf was stained with X-Gluc for 1 h and destained with ethanol for 3 days.

domains (Figure 6A), but its cellular localization remains to be characterized. Genome editing, especially base editing that induces DNA substitutions (Anzalone et al., 2020), will provide a robust tool with which to dissect the structure-function requirements of XA7 in an endogenous context.

## METHODS

### Plant materials, bacterial strains, medium, and growth conditions

The *indica* rice variety IR24, the recurrent near-isogenic line IRBB7 with *R* gene Xa7, and the *japonica* variety Nipponbare were kindly provided

by the International Rice Research Institute and the U.S. National Small Grains Collection. The rice line NB7 was a segregant from a cross of IRBB7 and Nipponbare that exhibited Xa7-mediated resistance activity and the tissue culture trait of Nipponbare. *N. benthamiana* seeds were kindly provided by Dr. Gregory Martin. Xoo strains PXO86, PXO99<sup>A</sup>, and PXO99<sup>A</sup> mutant ME2 and transformants ME2(*avrXa7*), ME2(*pthXo3*), and ME2(*pthXo1*) were from the collection of the Yang laboratory.

All rice plants were grown in the greenhouse and growth chambers with a 12-h 30°C light period and a 12-h 28°C dark period at 60%–75% relative humidity. *Escherichia coli* strains were grown in Luria-Bertani medium supplemented with appropriate antibiotics at 37°C. *Agrobacterium tumefaciens* strains were grown at 30°C. All Xoo strains were grown at 28°C on TSA (10 g/l tryptone, 10 g/l sucrose, 1 g/l glutamic acid, 1.5% Difco agar). Antibiotics were used at the following concentrations if required: 100 μg/ml ampicillin, 10 μg/ml cephalixin, 25 μg/ml rifampin, 25 μg/ml kanamycin, and 100 μg/ml spectinomycin.

### Disease assays

The leaf tip-clipping method was used to measure the lesion lengths of blight disease as described previously (Yang and Bogdanove 2013). In brief, an aliquot of the appropriate Xoo glycerol stock, stored at –80°C, was streaked onto TSA containing appropriate antibiotics and grown at 28°C for about 3 days. The bacterial cells were harvested from plates, suspended in sterile water, washed twice with water, and resuspended in water; the solution was adjusted to an optical density of 0.5 at 600 nm. Scissor blades were immersed in the Xoo suspension and used to clip the tip of a fully expanded leaf. The lesion lengths were measured at 14 days or at the specified days after inoculation. Three replicates with multiple leaves per replicate were examined for each Xoo strain. Data were plotted using BoxPlotR (<http://shiny.chemgrid.org/boxplotr/>). One-way analysis of variance was performed on all

(Figure 6A). XA27, the first executor *R* gene identified, is predicted to contain two transmembrane domains (Gu et al., 2005). The N terminus of XA27 is also predicted to contain a signal anchor-like sequence, leading to the cellular localization of XA27-green fluorescent protein to the apoplast and wall of xylem cells. Alterations to the hydrophobic nature of the signal anchor-like sequence change the location and resistance activity of XA27 to an avirulent strain of Xoo (Wu et al., 2008). On the other hand, XA10 is predicted to contain four transmembrane domains and localizes in the endoplasmic reticulum (ER) (Tian et al., 2014). XA10 was found to be associated with ER Ca<sup>2+</sup> depletion in plant and HeLa cells. Mutations that render the protein unable to deplete ER Ca<sup>2+</sup> and to cause cell death in *N. benthamiana* concomitantly abolish Xa10-mediated resistance in rice (Tian et al., 2014). Similarly, Bs4C-R, induced by AvrBs4 for the resistance of pepper to *Xanthomonas campestris* pathovar *vesicatoria*, encodes a 164-aa protein of unknown function (Strauss et al., 2012). Bs4C-R is predicted to contain four transmembrane motifs, and a fluorescent fusion protein of BS4C-R was shown to localize in the ER membrane in *N. benthamiana*. BS4C-R causes cell death in *N. benthamiana* when ectopically expressed (Wang et al., 2018). Significantly, Xa10 promoter-Bs4C genes confer rice resistance to Xoo strains carrying *avrXa10* (Wang et al., 2018). One exception to the small TALe-induced R proteins is Bs3 of pepper, which encodes 342 amino acids. Its gene product is homologous to the flavin-dependent monooxygenases (Römer et al., 2007), a group of enzymes that catalyze a wide range of chemo-, regio-, and enantio-selective oxygenation reactions (Huijbers et al., 2014). In this study, XA7 is predicted to possess two transmembrane

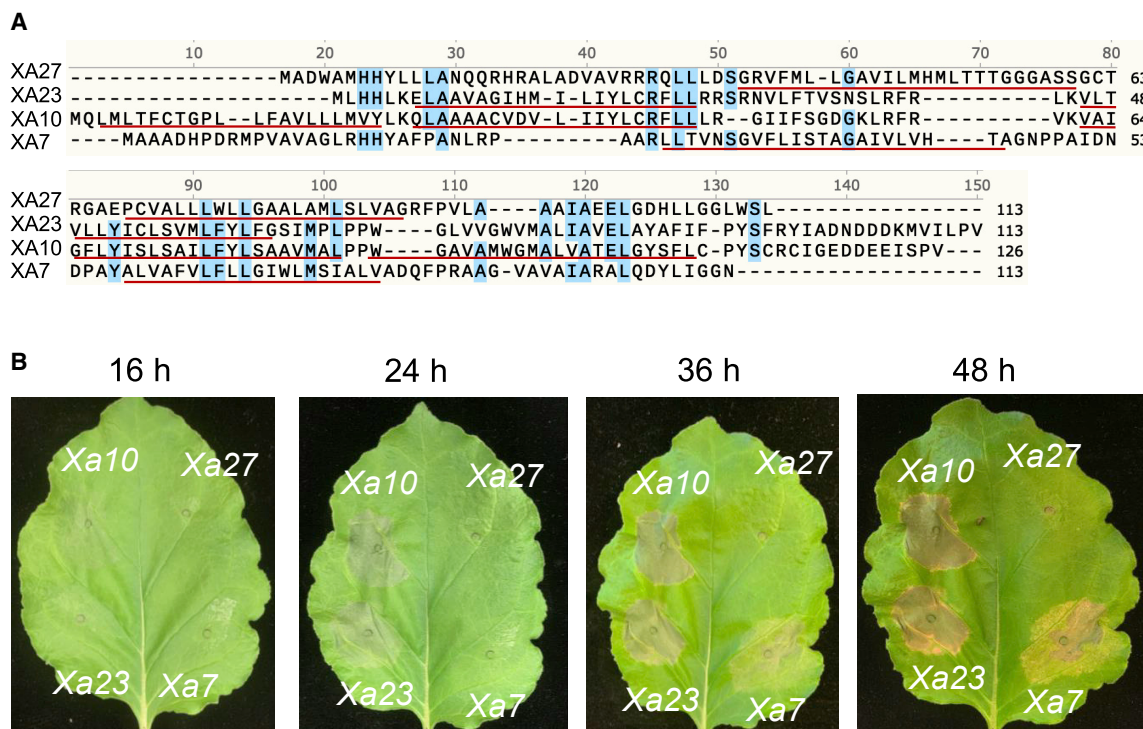

**Figure 6. Transient expression of TALE-induced *R* genes in *N. benthamiana*.**

**(A)** Alignment of predicted amino acids encoded by four executor *R* genes (*Xa7*, *Xa27*, *Xa23*, and *Xa10*). Conserved amino acids are shaded in blue. Transmembrane regions are underlined as predicted by TMpred ([https://embnet.vital-it.ch/software/TMPRED\\_form.html](https://embnet.vital-it.ch/software/TMPRED_form.html)). The NCBI COBALT multiple alignment tool was used. Sequences of *XA10*, *XA23*, and *XA27* are from NCBI accessions AGE45112.1, AIX09985.1, and AYY54165.1, respectively.

**(B)** Cell death (rapid localized cell collapse within 48 h) in *N. benthamiana* leaves. The four genes were placed under the control of the 35S promoter and transiently expressed through agroinfiltration. Different time points are indicated above each panel.

measurements. The Tukey honestly significant difference test was used for post-ANOVA pair-wise tests for significance ( $p < 0.05$ ).

### CRISPR-Cas9-based gene editing in rice

The CRISPR-Cas9 system used to generate a large chromosomal deletion in the *Xa7* locus and mutations within the *Xa7* coding region was described previously (Zhou et al., 2014). Two guide RNA genes (gRNA1 and gRNA2) targeting two sites spanning the 53-kb *Xa7* locus were constructed in the intermediate guide RNA vector pgRNA-1. The guide RNA gene cassette was mobilized into the Cas9 destination vector pBY02-Cas9-GW through the Gateway reaction using LR clonase (Thermo Fisher Scientific), resulting in pCas9-gRNA1+2. Similarly, two guide RNA genes targeting two sites (gRNA-3 and gRNA-4) in the *Xa7* coding region were combined into pBY02-Cas9-GW, resulting in pCas9-gRNA3+4. Both constructs were transferred into the *Xa7* isogenic line NB7 through the biolistic particle bombardment DNA delivery method. Rice tissue culture and regeneration were performed using methods described previously (Hiei et al., 1994). Genotyping the CRISPR plants from the T0 and T1 generations was performed by PCR amplification of relevant regions and Sanger sequencing of the amplicons.

### Gene expression assays

For RAMPAGE experiments, young leaves of IRBB7 were inoculated with PXO86 and the *avrXa7* knockout mutant MX53 (Hopkins et al., 1992). Total RNA was extracted using the TRIzol reagent (Thermo Fisher Scientific) 24 h after inoculation. Three replicates for each *Xoo* strain were used to construct RAMPAGE libraries for paired-end sequencing as described previously (Batut and Gingeras 2013; Raborn and Brendel 2019). In brief, total RNA was subjected to DNase I treatment, ribosomal RNA depletion, reverse complementary DNA synthesis with custom

RAMPAGE-specific oligos, cap-trapping of the 5'-complete cDNA and RNA double-stranded DNA/RNA, streptavidin-based pull-down of the biotinylated DNA/RNA, PCR amplification and size selection of double-stranded DNA, and Illumina-based paired-end sequencing. Library quality was assessed using the Agilent 2200 TapeStation instrument (Agilent Technologies, Santa Clara, CA, USA) at the Indiana University Center for Genomics and Bioinformatics. All computational analyses are documented for reproducibility at <https://github.com/BrendelGroup/AllRice> following the guidelines proposed in Brendel (2018).

### Transient TALE-specific *Xa7* promoter activity in *N. benthamiana*

*Xa7* promoter fusions to GUS reporter constructs were made using the 2.7-kb promoter region upstream of the *Xa7* ATG after amplification with the oligos Pro2.7kHind-F and *Xa7*ATG-R from IRBB7 genomic DNA. The amplicon was cloned into pCambia1305 at *HindIII* and *NcoI* through Gibson cloning (Gibson et al., 2009). To construct the *Xa7* promoter-GUS reporter with a mutant *AvrXa7* binding element, two fragments of the promoter were amplified with Pro2.7kHind-F and *DelEBE*-R3 and *DelEBE*-F3 and *Xa7*ATG-R from IRBB7 genomic DNA and inserted into pCambia1305 at *HindIII* and *NcoI*. The constructs were transferred into the *Agrobacterium* strain EHA105. The TALE expression constructs were made by cloning the coding regions of *avrXa7*, *pthXo3*, and *pthXo1* under the 35S promoter in pCambia1300 at *BamHI* and *SpeI* sites. *N. benthamiana* plants were grown under 12 h of light and 12 h of darkness at 25°C and approximately 40%–60% relative humidity. Leaves of 4-week-old *N. benthamiana* plants were used for infiltration with a 1-ml needleless syringe. *Agrobacterium* strain EHA105 that harbored the construct of interest was cultured in Luria-Bertani medium containing 25 mg/l rifampin, 25 mg/l kanamycin, and 100 μM acetosyringone. The bacterial



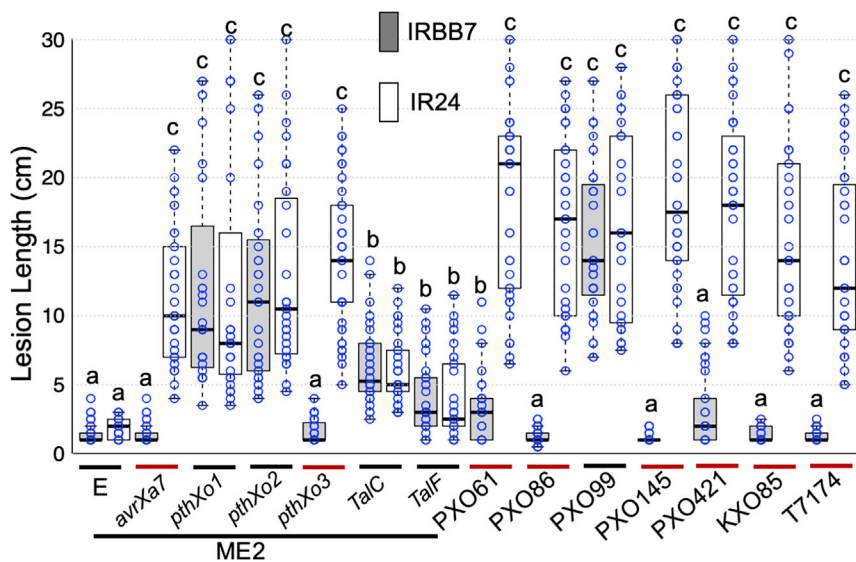

**Figure 7. Xa7 confers resistance to Xoo strains containing *avrXa7* or *pthXo3*.**

Rice plants of IR24 (clear boxes) and IRBB7 (filled boxes) were inoculated with strain ME2 carrying different major TALE genes. Individual strains are identified on the basis of the major TALE gene. Field isolates are specified below individual graphs to the left of the ME2-derived strains. Center lines indicate the median lesion length; box limits indicate the 25th and 75th percentiles as determined by R software; whiskers extend to the minimum and maximum values; box width is proportional to the square root of the sample size; and data points ( $n = 26\text{--}42$ ) are plotted as open circles. Treatments with the same lowercase letter are not significantly different at  $p < 0.05$ .

cells were collected through centrifugation and resuspended in Murashige and Skoog medium containing 100  $\mu\text{M}$  acetosyringone, pH 5.8. The cell suspension was adjusted to an OD<sub>600</sub> of 0.2 for infiltration. For co-inoculation, cells of two *Agrobacterium* strains were mixed in equal volume before infiltration into *N. benthamiana* leaves.

### Sequencing and annotation of the Xa7 region

Genomic DNA of IRBB7 was extracted using the CTAB method (Porebski et al., 1997). Sequencing was conducted using long-read Oxford Nanopore and Illumina technologies. The assembler Flye (Kolmogorov et al., 2019) was used to create a *de novo* assembly of the IRBB7 genome. The resulting contigs were first corrected by re-mapping Nanopore reads and correcting with the medaka tool. A second correction was performed by mapping highly accurate Illumina reads using Bowtie 2 (Langmead and Salzberg 2012) and the Pilon correction tool (Walker et al., 2014). Gene structure annotation was based on spliced alignment of homologous proteins and transcripts using GenomeThreader (Gremme et al., 2005).

### Survey of the Xa7 locus from 3000 rice genomes

The complete 3000 rice genome project (3K RGP) database was downloaded from <http://gigadb.org/dataset/200001>. The database contains ~11 Tb of raw paired-end Illumina reads from 3010 diverse cultivated rice (*Oryza sativa* L.) accessions. Reads were mapped against the 4-kb region spanning the Xa7 locus using Bowtie 2 (Langmead and Salzberg 2012). The mapped reads were retrieved from 294 rice lines (including IRBB7), compressed as bam files, and sorted. A consensus fasta file of the Xa7 region from each rice line was created using SAMtools and BCFTools (Li et al., 2009; Li 2011). The process was performed using a customized Unix pipeline (Supplemental Information 2).

### ACCESSION NUMBERS

The NCBI GenBank accession numbers are MW467883 for the Xa7 cDNA, MW561276 for the Xa7 contig, and GSE165583 for the RAMPAGE data. All computational analyses are documented for reproducibility at <https://github.com/BrendelGroup/AllRice>.

### SUPPLEMENTAL INFORMATION

Supplemental Information is available at *Plant Communications* online.

### FUNDING

This work was partially supported by the United States Department of Agriculture National Institute of Agriculture and Food (2017-67013-

26521 to B.Y.), the National Science Foundation (1238189 to F.F.W., V.P.B., and B.Y.; 1741090 to F.F.W.), and subawards to University of Missouri and University of Florida from the Heinrich Heine University Düsseldorf funded by the Bill & Melinda Gates Foundation [OPP1155704] (B.Y. and F.F.W.).

### AUTHOR CONTRIBUTIONS

B.Y. and D.L. conceived the experiments. D.L. performed the experiments. J.C.H.-T. and F.F.W. conducted Nanopore sequencing of IRBB7, performed genome assembly, and analyzed the 3000 rice genomes for Xa7 prevalence. R.T.R. constructed and sequenced the RAMPAGE and RNA sequencing libraries. V.P.B. analyzed the RAMPAGE and RNA sequencing data. D.L. and B.Y. wrote the manuscript, and F.F.W. edited the manuscript with input from all other co-authors.

### ACKNOWLEDGMENTS

We are grateful to the US National Small Grains Collection (NSGC) and the International Rice Research Institute for providing rice accessions, and to Drs. Xingu Mao and Lifeng Zhao for help with Xa7 mapping experiments. No conflict of interest declared.

Received: December 28, 2020

Revised: January 14, 2021

Accepted: January 15, 2021

Published: January 19, 2021

### REFERENCES

- Antony, G., Zhou, J., Huang, S., Li, T., Liu, B., White, F., and Yang, B. (2010). Rice *xa13* recessive resistance to bacterial blight is defeated by induction of the disease susceptibility gene Os-11N3. *Plant Cell* 22:3864–3876.
- Anzalone, A.V., Koblan, L.W., and Liu, D.R. (2020). Genome editing with CRISPR-Cas nucleases, base editors, transposases and prime editors. *Nat. Biotechnol.* 38:824–844.
- Bai, J., Choi, S.H., Ponciano, G., Leung, H., and Leach, J.E. (2000). *Xanthomonas oryzae* pv. *oryzae* avirulence genes contribute differently and specifically to pathogen aggressiveness. *Mol. Plant Microbe Interact.* 13:1322–1329.
- Batut, P., and Gingeras, T.R. (2013). RAMPAGE: promoter activity profiling by paired-end sequencing of 5'-complete cDNAs. *Curr. Protoc. Mol. Biol.* 104, Unit 25B.11.

- Booher, N.J., and Bogdanove, A.J.** (2014). Tools for TAL effector design and target prediction. *Methods* **69**:121–127.
- Brendel, V.P.** (2018). From small RNA discoveries to a new paradigm in computational genomics? *New Phytol.* **220**:659–660.
- Chen, S., Huang, Z.G., Zeng, L.X., Yang, J.Y., Liu, Q.G., and Zhu, X.Y.** (2008). High-resolution mapping and gene prediction of *Xanthomonas oryzae* pv. *oryzae* resistance gene *Xa7*. *Mol. Breed.* **22**:433–441.
- Chu, Z., Yuan, M., Yao, J., Ge, X., Yuan, B., Xu, C., Li, X., Fu, B., Li, Z., Bennetzen, J.L., et al.** (2006). Promoter mutations of an essential gene for pollen development result in disease resistance in rice. *Genes Dev.* **20**:1250–1255.
- Cook, D.E., Mesarich, C.H., and Thomma, B.P.** (2015). Understanding plant immunity as a surveillance system to detect invasion. *Annu. Rev. Phytopathol.* **53**:541–563.
- Copetti, D., Zhang, J., El Baidouri, M., Gao, D., Wang, J., Barghini, E., Cossu, R.M., Angelova, A., Maldonado L, C.E., Roffler, S., et al.** (2015). RiTE database: a resource database for genus-wide rice genomics and evolutionary biology. *BMC Genomics* **16**:538.
- Dossa, G.S., Quibod, I., Atienza-Grande, G., Oliva, R., Maiss, E., Vera Cruz, C., and Wydra, K.** (2020). Rice pyramided line IRBB67 (*Xa4/Xa7*) homeostasis under combined stress of high temperature and bacterial blight. *Sci. Rep.* **10**:683.
- Doyle, E.L., Booher, N.J., Standage, D.S., Voytas, D.F., Brendel, V.P., Vandyk, J.K., and Bogdanove, A.J.** (2012). TAL Effector-Nucleotide Targeter (TALE-NT) 2.0: tools for TAL effector design and target prediction. *Nucleic Acids Res.* **40**:W117–W122.
- Feng, F., and Zhou, J.M.** (2012). Plant-bacterial pathogen interactions mediated by type III effectors. *Curr. Opin. Plant Biol.* **15**:469–476.
- Gibson, D.G., Young, L., Chuang, R.Y., Venter, J.C., Hutchison, C.A., and Smith, H.O.** (2009). Enzymatic assembly of DNA molecules up to several hundred kilobases. *Nat. Methods* **6**:343–345.
- Gremme, G., Brendel, V., Sparks, M.E., and Kurtz, S.** (2005). Engineering a software tool for gene structure prediction in higher organisms. *Inf. Softw. Technol.* **47**:965–978.
- Gu, K., Yang, B., Tian, D., Wu, L., Wang, D., Sreekala, C., Yang, F., Chu, Z., Wang, G.L., White, F.F., et al.** (2005). *R* gene expression induced by a type-III effector triggers disease resistance in rice. *Nature* **435**:1122–1125.
- Hiei, Y., Ohta, S., Komari, T., and Kumashiro, T.** (1994). Efficient transformation of rice (*Oryza sativa* L.) mediated by *Agrobacterium* and sequence analysis of the boundaries of the T-DNA. *Plant J.* **6**:271–282.
- Hopkins, C.M., White, F.F., Choi, S.H., Guo, A., and Leach, J.E.** (1992). Identification of a family of avirulence genes from *Xanthomonas oryzae* pv. *oryzae*. *Mol. Plant Microbe Interact.* **5**:451–459.
- Hsu, Y.C., Chiu, C.H., Yap, R., Tseng, Y.C., and Wu, Y.P.** (2020). Pyramiding bacterial blight resistance genes in Tainung82 for broad-spectrum resistance using marker-assisted selection. *Int. J. Mol. Sci.* **21**:1281.
- Hu, K., Cao, J., Zhang, J., Xia, F., Ke, Y., Zhang, H., Xie, W., Liu, H., Cui, Y., Cao, Y., et al.** (2017). Improvement of multiple agronomic traits by a disease resistance gene via cell wall reinforcement. *Nat. Plants* **3**:17009.
- Huijbers, M.M., Montersino, S., Westphal, A.H., Tischler, D., and van Berkel, W.J.** (2014). Flavin dependent monooxygenases. *Arch. Biochem. Biophys.* **544**:2–17.
- Institute, I.R.R.** (2006). Breeding for disease resistance in rice: bacterial blight. [http://www.knowledgebank.irri.org/ricebreedingcourse/Breeding\\_for\\_disease\\_resistance\\_Blight.htm](http://www.knowledgebank.irri.org/ricebreedingcourse/Breeding_for_disease_resistance_Blight.htm).
- Iyer, A.S., and McCouch, S.R.** (2004). The rice bacterial blight resistance gene *xa5* encodes a novel form of disease resistance. *Mol. Plant Microbe Interact.* **17**:1348–1354.
- Jackson, R.W., Athanassopoulos, E., Tsiamis, G., Mansfield, J.W., Sesma, A., Arnold, D.L., Gibbon, M.J., Murillo, J., Taylor, J.D., and Vivian, A.** (1999). Identification of a pathogenicity island, which contains genes for virulence and avirulence, on a large native plasmid in the bean pathogen *Pseudomonas syringae* pathovar *phaseolicola*. *Proc. Natl. Acad. Sci. U S A* **96**:10875–10880.
- Ji, C., Ji, Z., Liu, B., Cheng, H., Liu, H., Liu, S., Yang, B., and Chen, G.** (2020). *Xa1* Allelic R genes activate rice blight resistance suppressed by interfering TAL effectors. *Plant Commun.* **1**:100087.
- Jones, J.D., and Dangl, J.L.** (2006). The plant immune system. *Nature* **444**:323–329.
- Kaji, K., and Ogawa, T.** (1995). Identification of the located chromosome of the resistance gene. *Xa-7* to bacterial leaf blight in rice. *Breed. Sci.* **45**:79.
- Kolmogorov, M., Yuan, J., Lin, Y., and Pevzner, P.A.** (2019). Assembly of long, error-prone reads using repeat graphs. *Nat. Biotechnol.* **37**:540–546.
- Langmead, B., and Salzberg, S.L.** (2012). Fast gapped-read alignment with Bowtie 2. *Nat. Methods* **9**:357–359.
- Leach, J.E., and White, F.F.** (1996). Bacterial avirulence genes. *Annu. Rev. Phytopathol.* **34**:153–179.
- Lee, K.S., Rasabandith, S., Angeles, E.R., and Khush, G.S.** (2003). Inheritance of resistance to bacterial blight in 21 cultivars of rice. *Phytopathology* **93**:147–152.
- Li, H.** (2011). A statistical framework for SNP calling, mutation discovery, association mapping and population genetical parameter estimation from sequencing data. *Bioinformatics* **27**:2987–2993.
- Li, H., Handsaker, B., Wysoker, A., Fennell, T., Ruan, J., Homer, N., Marth, G., Abecasis, G., Durbin, R., and Subgroup, G.P.D.P.** (2009). The sequence alignment/map format and SAMtools. *Bioinformatics* **25**:2078–2079.
- Li, T., Huang, S., Zhou, J., and Yang, B.** (2013). Designer TAL effectors induce disease susceptibility and resistance to *Xanthomonas oryzae* pv. *oryzae* in rice. *Mol. Plant* **6**:781–789.
- Liu, Q., Yuan, M., Zhou, Y., Li, X., Xiao, J., and Wang, S.** (2011). A paralog of the MtN3/saliva family recessively confers race-specific resistance to *Xanthomonas oryzae* in rice. *Plant Cell Environ.* **34**:1958–1969.
- McCarthy, D.J., Chen, Y., and Smyth, G.K.** (2012). Differential expression analysis of multifactor RNA-seq experiments with respect to biological variation. *Nucleic Acids Res.* **40**:4288–4297.
- Monteiro, F., and Nishimura, M.T.** (2018). Structural, functional, and genomic diversity of plant NLR proteins: an evolved resource for rational engineering of plant immunity. *Annu. Rev. Phytopathol.* **56**:243–267.
- Niño-Liu, D.O., Ronald, P.C., and Bogdanove, A.J.** (2006). *Xanthomonas oryzae* pathovars: model pathogens of a model crop. *Mol. Plant Pathol.* **7**:303–324.
- Oerke, E.C.** (2006). Crop losses to pests. *J. Agric. Sci.* **144**:13.
- Ogawa, T., Yamaoto, T., Khush, G.S., and Mew, T.-W.** (1991). Breeding of near-isogenic lines of rice with single genes for resistance to bacterial blight pathogen (*Xanthomonas campestris* pv. *oryzae*). *Japan. J. Breed.* **41**:523–529.
- Oliva, R., Ji, C., Atienza-Grande, G., Huguet-Tapia, J.C., Perez-Quintero, A., Li, T., Eom, J.S., Li, C., Nguyen, H., Liu, B., et al.** (2019). Broad-spectrum resistance to bacterial blight in rice using genome editing. *Nat. Biotechnol.* **37**:1344–1350.

- Porebski, S., Bailey, L.G., and Baum, B.R. (1997). Modification of a CTAB DNA extraction protocol for plants containing high polysaccharide and polyphenol components. *Plant Mol. Biol. Rep.* **15**:8.
- Porter, B.W., Chittoor, J.M., Yano, M., Sasaki, T., and White, F.F. (2003). Development and mapping of markers linked to the rice bacterial blight resistance gene *Xa7*. *Crop Sci.* **43**:1484–1492.
- Raborn, R.T., and Brendel, V.P. (2019). Using RAMPAGE to identify and annotate promoters in insect genomes. *Methods Mol. Biol.* **1858**:99–116.
- Raborn RT, Sridharan K, Brendel VP (2017). TSRchitect: Promoter identification from large-scale TSS profiling data. <https://doi.org/10.18129/B9.bioc.TSRchitect>.
- Robinson, M.D., McCarthy, D.J., and Smyth, G.K. (2010). edgeR: a Bioconductor package for differential expression analysis of digital gene expression data. *Bioinformatics* **26**:139–140.
- Romer, P., Recht, S., and Lahaye, T. (2009). A single plant resistance gene promoter engineered to recognize multiple TAL effectors from disparate pathogens. *Proc. Natl. Acad. Sci. U S A* **106**:20526–20531.
- Römer, P., Hahn, S., Jordan, T., Strauss, T., Bonas, U., and Lahaye, T. (2007). Plant pathogen recognition mediated by promoter activation of the pepper *Bs3* resistance gene. *Science* **318**:645–648.
- Römer, P., Recht, S., and Lahaye, T. (2009). A single plant resistance gene promoter engineered to recognize multiple TAL effectors from disparate pathogens. *Proc. Natl. Acad. Sci. U S A* **106**:20526–20531.
- Savary, S., Willocquet, L., Pethybridge, S.J., Esker, P., McRoberts, N., and Nelson, A. (2019). The global burden of pathogens and pests on major food crops. *Nat. Ecol. Evol.* **3**:430–439.
- Song, W.Y., Wang, G.L., Chen, L.L., Kim, H.S., Pi, L.Y., Holsten, T., Gardner, J., Wang, B., Zhai, W.X., Zhu, L.H., et al. (1995). A receptor kinase-like protein encoded by the rice disease resistance gene, *Xa21*. *Science* **270**:1804–1806.
- Spoel, S.H., and Dong, X. (2012). How do plants achieve immunity? Defence without specialized immune cells. *Nat. Rev. Immunol.* **12**:89–100.
- Strauss, T., van Poecke, R., Strauss, A., Romer, P., Minsavage, G., Singh, S., Wolf, C., Kim, S., Lee, H., Yeom, S., et al. (2012). RNA-seq pinpoints a *Xanthomonas* TAL-effector activated resistance gene in a large-crop genome. *Proc. Natl. Acad. Sci. U S A* **109**:19480–19485.
- Sun, X., Cao, Y., Yang, Z., Xu, C., Li, X., Wang, S., and Zhang, Q. (2004). *Xa26*, a gene conferring resistance to *Xanthomonas oryzae* pv. *oryzae* in rice, encodes an LRR receptor kinase-like protein. *Plant J.* **37**:517–527.
- Tian, D., Wang, J., Zeng, X., Gu, K., Qiu, C., Yang, X., Zhou, Z., Goh, M., Luo, Y., Murata-Hori, M., et al. (2014). The rice TAL effector-dependent resistance protein XA10 triggers cell death and calcium depletion in the endoplasmic reticulum. *Plant Cell* **26**:497–515.
- Walker, B.J., Abeel, T., Shea, T., Priest, M., Abouelliel, A., Sakthikumar, S., Cuomo, C.A., Zeng, Q., Wortman, J., Young, S.K., et al. (2014). Pilon: an integrated tool for comprehensive microbial variant detection and genome assembly improvement. *PLoS One* **9**:e112963.
- Wang, C., Zhang, X., Fan, Y., Gao, Y., Zhu, Q., Zheng, C., Qin, T., Li, Y., Che, J., Zhang, M., et al. (2015). XA23 is an executor R protein and confers broad-spectrum disease resistance in rice. *Mol. Plant* **8**:290–302.
- Wang, J., Tian, D., Gu, K., Yang, X., Wang, L., Zeng, X., and Yin, Z. (2017). Induction of *Xa10*-like genes in rice cultivar nipponbare confers disease resistance to rice bacterial blight. *Mol. Plant Microbe Interact.* **30**:466–477.
- Wang, J., Zeng, X., Tian, D., Yang, X., Wang, L., and Yin, Z. (2018). The pepper Bs4C proteins are localized to the endoplasmic reticulum (ER) membrane and confer disease resistance to bacterial blight in transgenic rice. *Mol. Plant Pathol.* **19**:2025–2035.
- Webb, K.M., Oña, I., Bai, J., Garrett, K.A., Mew, T., Vera Cruz, C.M., and Leach, J.E. (2010). A benefit of high temperature: increased effectiveness of a rice bacterial blight disease resistance gene. *New Phytol.* **185**:568–576.
- Wu, L., Goh, M.L., Sreekala, C., and Yin, Z. (2008). XA27 depends on an amino-terminal signal-anchor-like sequence to localize to the apoplast for resistance to *Xanthomonas oryzae* pv. *oryzae*. *Plant Physiol.* **148**:1497–1509.
- Xiang, Y., Cao, Y., Xu, C., Li, X., and Wang, S. (2006). *Xa3*, conferring resistance for rice bacterial blight and encoding a receptor kinase-like protein, is the same as *Xa26*. *Theor. Appl. Genet.* **113**:1347–1355.
- Xu, J., Jiang, J., Dong, X., Ali, J., and Mou, T. (2012). Introgression of bacterial blight (BB) resistance genes *Xa7* and *Xa21* into popular restorer line and their hybrids by molecular marker-assisted backcross (MABC) selection scheme. *Afr. J. Biotechnol.* **11**:9.
- Yang, B., and Bogdanove, A. (2013). Inoculation and virulence assay for bacterial blight and bacterial leaf streak of rice. *Methods Mol. Biol.* **956**:249–255.
- Yang, B., and White, F.F. (2004). Diverse members of the AvrBs3/PthA family of type III effectors are major virulence determinants in bacterial blight disease of rice. *Mol. Plant Microbe Interact.* **17**:1192–1200.
- Yang, B., Zhu, W., Johnson, L., and White, F. (2000). The virulence factor AvrXa7 of *Xanthomonas oryzae* pv. *oryzae* is a type III secretion pathway-dependent nuclear-localized double-stranded DNA-binding protein. *Proc. Natl. Acad. Sci. U S A* **97**:9807–9812.
- Yoshimura, S., Yamanouchi, U., Katayose, Y., Toki, S., Wang, Z.X., Kono, I., Kurata, N., Yano, M., Iwata, N., and Sasaki, T. (1998). Expression of *Xa1*, a bacterial blight-resistance gene in rice, is induced by bacterial inoculation. *Proc. Natl. Acad. Sci. U S A* **95**:1663–1668.
- Zhang, B., Zhang, H., Li, F., Ouyang, Y., Yuan, M., Li, X., Xiao, J., and Wang, S. (2020). Multiple alleles encoding atypical NLRs with unique central tandem repeats in rice confer resistance to *Xanthomonas oryzae* pv. *oryzae*. *Plant Commun.* **1**:100088.
- Zhang, Y.C., Wang, J.F., Pan, J.W., Gu, Z.M., Chen, X.F., Jin, Y., Liu, F., Zhang, H.S., and Ma, B.J. (2009). Identification and molecular mapping of the rice bacterial blight resistance gene allelic to *Xa7* from an elite restorer line Zhenhui 084. *Eur. J. Plant Pathol.* **125**:235–244.
- Zhou, H., Liu, B., Weeks, D.P., Spalding, M.H., and Yang, B. (2014). Large chromosomal deletions and heritable small genetic changes induced by CRISPR/Cas9 in rice. *Nucleic Acids Res.* **42**:10903–10914. <https://doi.org/10.1093/nar/gku806>.

**Plant Communications, Volume 2**

**Supplemental information**

**The *Xa7* resistance gene guards the rice susceptibility gene *SWEET14* against exploitation by the bacterial blight pathogen**

**Dangping Luo, Jose C. Huguet-Tapia, R. Taylor Raborn, Frank F. White, Volker P. Brendel, and Bing Yang**

# The *Xa7* Resistance Gene Guards the Susceptibility Gene *SWEET14* of Rice Against Exploitation by Bacterial Blight Pathogen

Dangping Luo<sup>1</sup>, Jose C. Huguet-Tapia<sup>2</sup>, Taylor R. Raborn<sup>3</sup>, Frank F. White<sup>2</sup>, Volker P. Brendel<sup>3</sup>, Bing Yang<sup>1,4,\*</sup>

<sup>1</sup> Division of Plant Sciences, Bond Life Sciences Center, University of Missouri, Columbia, MO 65211, USA

<sup>2</sup> Department of Plant Pathology, University of Florida, Gainesville, FL 32611, USA

<sup>3</sup> Department of Biology, Department of Computer Science, Indiana University, Bloomington, IN 47405, USA

<sup>4</sup> Donald Danforth Plant Science Center, St. Louis, MO 63132, USA

\* Correspondence: Bing Yang ([yangbi@missouri.edu](mailto:yangbi@missouri.edu))

## Files:

Supplemental Table 1. Molecular markers used in this study

Supplemental Table 2. Oligonucleotides used in this study

Supplemental Information 1. The cDNA sequence of *Xa7*

Supplemental Information 2. gBlocks of *Xa7* homologous genes

Supplemental File 1. Program for genome assembly

Supplemental Figure 1. Large chromosomal fragment deletion of *Xa7* locus

Supplemental Figure 2. Screenshot of RAMPAGE analysis displayed with the Integrative Genomics Viewer (Thorvaldsdóttir, Robinson et al. 2013)

Supplemental Figure 3. *Xa7* and homologs in diverse grass species

**Supplemental Table 1. Molecular markers used in this study.**

| Marker  | Primer   | Size in IRBB7 (bp) | Size in Nipponbare (bp) |
|---------|----------|--------------------|-------------------------|
| RM7243  | RM7243F  | 150                | 158                     |
|         | RM7243R  |                    |                         |
| RM20571 | RM20571F | 123                | 117                     |
|         | RM20571R |                    |                         |
| RM5509  | RM5509F  | 229                | 255                     |
|         | RM5509R  |                    |                         |
| 5610    | 5610F    | 261                | 231                     |
|         | 5610R    |                    |                         |
| M5      | M5-F     | 343                | 1219                    |
|         | M5-R     |                    |                         |
| M5-3k   | M5-3kF   | 143                | 122                     |
|         | M5-3kR   |                    |                         |
| M5-5k   | M5-5kF   | 107                | 104                     |
|         | M5-5kR   |                    |                         |
| M5-48k  | M5-48kF  | 152                | 144                     |
|         | M5-48kR  |                    |                         |
| M5-72k  | M5-72kF  | 127                | 136                     |
|         | M5-72kR  |                    |                         |
| RM20593 | RM20593F | 314                | 316                     |
|         | RM20593R |                    |                         |
| RM3723  | RM3723F  | 130                | 138                     |
|         | RM3723R  |                    |                         |

**Sequences of each markers in IRBB7 and Nipponbare**

**RM7243**

IRBB7

AAGATGGCGTGCGTACGTACGTACGTGCGGCGCGGGCGTACAGGCGTACAGGGCGC  
CGCGCGACGCATGGATGGATGGATCGATGGATCGATGGTCCC GGGCGGCACAGGCA  
GGGGCTCCCCGACCGGGCAACCCGTGAAGAACTTCGT

Nipponbare

AAGATGGCGTGCGTACGTACGTACGTGCGGCGCGGGCGTACAGGCGTACAGGGCGC  
CGCGCGACGCATGGATGGATGGATGGATGGATCGATGGATCGATGGTCCC GGGCGG  
CACAGGCAGGGGCTCCCCGACCGGGCAACCCGTGAAGAACTTCGT

**RM20571**

IRBB7

GAGAGGTGGAGAGATGGATGTGGAGGGTGGTGGTGGTGGTGGTGGTGGTGGTGGCG  
CGCCGCCAGGGGGAGGAATTCTTGGGTAATCAATTAAGCTTTGGTTCTTGGTTTGG  
TTCTTTGGTC



Nipponbare

CGATCTTACTGGCTCTGCAACTCTGTATTGCATGCTAAATCCGTTATGATTTACTACT  
AATGATGGATGTACTGATACATAGTACTGATCGATGAGCTAGCTAGGGTTTTGGATG  
GGTCGGAAGGTGAGAAAGAGGAGGAAAGAAGAGAGAATCTATTATATTATTAAG  
GAATAGAAAAAGAAGCCTCCACGTTTCGCTCTCACGGCCTAGAAATTCTCACATTAAT  
CGGAGAAAAGAAAAGCAGAGTCCATATAGAAATACAATTTAGAAATAGCTGAAAT  
TCGGAATTATAAAATAAGGAATATTAGAAGAGGAGACTAGAGTCCATATGGAAATA  
CAATTTAGAAATAGTTGAAATTCAGAATTAATAAATAAGAAATATTAGAAGAGGAG  
ACTAGAGTCCATATAGAAATATAATTAGGAAATAACTGAAATTCGGAATTAATAAAT  
AAGGAATATTAGAAGTAGAGTATAGAGTCCATATAAAAAATATAATTAGGAAATAAC  
TGAAATTAGGAATTAATAATAAGGAATATTAGAGATAGAGTATAGAGTCCATATAA  
AAATACAATTAGTAAATAACTGTAATTCGGAATTAATAAATAAGGAATATTAGAGGT  
AGAGTATAGAGTCCATATAGAAATACAATTAGAAAATAACTGTAATTCGGAATTA  
AAATAAGGAATATTAGAGGTAGAGTATAGAGTCCATATAAAAAATACAATTAGGAAA  
TAACTGAAATTCGGAATTAATAAATAAGGAATATTAGAGGTAGAGTATAGAGTCCAT  
ATAGAAATACAATTAGAAAATAATAAAAAATTCGGAATTAATAAATTTGATATTA  
ATAATTAATAACTAACACGTATATATAATACAATATAAATATTACACATTAGTAGTT  
TTACAAAATTTAAAATTATATTGTCATTTTAATAAATTTGAATAATACATTGAGAAA  
ACATATATGCTATTACATGAGAGAAAATATAATGATGCTAGCCGCGCAATATGCAC  
GGGCCACTATGCTAGTTGAAGATGATTAGAAGAAATCTAATCAATTCAGAGCATT  
CTGTATTCATCTTTTCAGTGTATATTCGCTCTGGGTAGTGCTGATTGTGCCATTATA  
GACGGGGTTCGTAATTCGTACGGACGAATCGACACAGACATGCATGATTGTCTTTAG  
TACTTAGAATTAGTAGCAAAGTCGGTGGGACAAC

**M5-3k**

IRBB7

CATATGTAGCAAGTATGCATCCAGCGAAACCCCATGGATTAATTAATTTGGCGGTAG  
ATCTCATCATAACAGAGAGTACGTACGTAGTAGTACTGTAGTACACTTGGATATATA  
CAAATTAAGCCAACACATTAGTCTTCAGA

Nipponbare

CATATGTAGCAAGTATGCATCCAGCGAAACCCCTAGATCTCATCATAACAGAGAGT  
ACGTACGTAGTAGTACTGTAGTACACTTGGATATATACAAATTAAGCCAACACATTA  
GTCTTCAGA

**M5-5k**

IRBB7

TGTAGAGATTGTGACGAGGAGCAGTGCAAGTTTCAGGTAGTGATGCATCAGGCGTTT  
GCCCTCTTTCCTTGCAATGCTACTCGCTGATGATCCATTCTGCAACATCA

Nipponbare

TGTAGAGATTGTGACGAGGAGCAATGCAAATTTTCAGGTAGTGATGCGTCAGGCGCT  
TGCCCTCTTTCCTTGCAATGCTACTCGCTGATCCATTCTGCAACATCA

**M5-48k**

IRBB7



CTGTGTGAAAGTTCAGACGGATGGCGATTTTCGCAAAGATGTACTCCATTTGAGATCT  
TTATGTGTATGTATGTATACTTGTCAAGTCTGATGGAGGTCCAAAGAAATGGCAGTC  
TACTGATGCTGGAATGCAGTCTCATGTGCTCAAAGCAG

Nipponbare

CTGTGTGAAAGTTCAGACGGATGGCGATTTTGCAAAGATGTACTCCATTTGATATCT  
TTGTGTGTATACTTGCCAGGTCTGATGGAGGTCCAAAGAAATGGCAGTCTACTGATG  
CTGGAATACAGTCTCATGTGCTCAAAGCAG

**M5-72k**

IRBB7

TGGAAAGGAAGCTCCTCGACGGCGGCGTGGGCGGGCGCCGCGGGCGGCGGTACCATC  
TACGGCTGCCCCGGTGATGGTTCGACGTCGATCTCAACAAGTTCGAGCCATGGGACCTT  
CCTGGTAAGACCTA

Nipponbare

TGGAAAGGAAGCTCCTCGACGGCGGCGTGGGCGGGCGCCGCGGGCGGCGGGCGGC  
GGTCACCATCTACGGCTGCCCCGGTGATGGTTCGACGTCGATCTCAACAAGTTCGAGCC  
ATGGGACCTTCTGGTAAGACCTA

**RM20593**

IRBB7

AAGGTACACTTGCTCTGACGGTAGCAAAAGTTGATCATGCCCTACTTTAGCTGTAAC  
ATGAGACATGTCAGCATATGCTTACATGCATGAATCAGCAGGGCTACAGTTTTATTA  
TTTGCTTTGACAGCTTTCTCTCAACAATCATTCTCATTATATTTTTTATCCTAGGCTCC  
TTAGGAACATAGTAATTTTACAGGATTTTTGCTGAAATCGATCAGTTCAGTTCCCGC  
AAAATTCCACTGAAAATTAATCCTCTACTCCAAAGGCCTCTCTCTCTCTCTCTCTC  
TCACGTAGGATTTGCCACTGAGGTCT

Nipponbare

AAGGTACACTTGCTCTGACGGTAGCAAAAGTTGATCATGCCCTACTTTAGCTGTAAC  
ATGAGACATGTCAGCATATGCTTACATGCATGAATCAGCAGGGCTACAGTTTTATTA  
TTTGCTTTGACAGCTTTCTCTCAACAATCATTCTCATTATATTTTTTATCCTAGGCTCC  
TTAGGAACATAGTAATTTTACAGGATTTTTGCTGAAATCGATCAGTTCAGTTCCCGC  
AAAATTCCACTGAAAATTAATCCTCTACTCCAAAGGCCTCTCTCTCTCTCTCTCTC  
TCTCACGTAGGATTTGCCACTGAGGTCT

**RM3723F**

IRBB7

TAGACATGGGTCCCTCACAGATGGAACCCATTCTCATAGGCTCACATGTCAGCGGAC  
ACATATTCCTCTAACTTAGAGGAGCCTCCCCCTAATGAAAGTGTAATATAGGATCAG  
AAGCAAGACTTGTGGA

Nipponbare

TAGACATGGGTCCCTCACAGATGGAACCCATTCTCATAGGCTCACATGTCAGCGGAC  
ACATATTCACATATTCCTCTAACTTAGAGGAGCCTCCCCCTAATGAAAGTGTAATAT  
AGGATCAGAAGCAAGACTTGTGGA

**Supplemental Table 2. Oligonucleotides used in this study**

| Oligos              | Sequence (5' TO 3')                             | Usage                                                                 |                                                                    |
|---------------------|-------------------------------------------------|-----------------------------------------------------------------------|--------------------------------------------------------------------|
| RM7243F             | ACGAAGTTCTTCACGGGTTG                            | Mapping                                                               |                                                                    |
| RM7243R             | AAGATGGCGTGCGTACGTAC                            |                                                                       |                                                                    |
| RM20571F            | GAGAGGTGGAGAGATGGATGTGG                         |                                                                       |                                                                    |
| RM20571R            | GACCAAAGAACCAAACCAAGAACC                        |                                                                       |                                                                    |
| RM5509F             | GATGATCCATGCTTTGGCC                             |                                                                       |                                                                    |
| RM5509R             | TTCCAGCAGAAAGAAGACGC                            |                                                                       |                                                                    |
| 5610F               | AAGCTCGTCACCTCACCCGTAC                          |                                                                       |                                                                    |
| 5610R               | TGCACAGTAGCAGCATATCTGCAG                        |                                                                       |                                                                    |
| M5-F                | GTTGTCCCACCGACTTTGCTA                           |                                                                       |                                                                    |
| M5-R                | CGATCTTACTGGCTCTGCAACTCT                        |                                                                       |                                                                    |
| M5-3kF              | CATATGTAGCAAGTATGCATCC                          |                                                                       |                                                                    |
| M5-3kR              | TCTGAAGACTAATGTGTTGGCT                          |                                                                       |                                                                    |
| M5-5kF              | TGTAGAGATTGTGACGAG                              |                                                                       |                                                                    |
| M5-5kR              | TGATCCATTCTGCAAC                                |                                                                       |                                                                    |
| M5-48kF             | CTGTGTGAAAGTTCAGACGG                            |                                                                       |                                                                    |
| M5-48kR             | CTGCTTTGAGCACATGAGAC                            |                                                                       |                                                                    |
| M5-72kF             | TGGAAAGGAAGCTCCTCGAC                            |                                                                       |                                                                    |
| M5-72kR             | TAGGTCTTACCAGGAAGGTC                            |                                                                       |                                                                    |
| RM20593F            | AAGGTACACTTGCTCTGACGGTAGC                       |                                                                       |                                                                    |
| RM20593R            | AGACCTCAGTGGCAAATCCTACG                         |                                                                       |                                                                    |
| RM3723F             | TAGACATGGGTCCCTCACAGATG                         |                                                                       |                                                                    |
| RM3723R             | TCCACAAGTCTTGCTTCTGATCC                         |                                                                       |                                                                    |
| 3628F               | TGTCCGGTGTCTCTAGCTTC                            |                                                                       |                                                                    |
| 3628R               | ACCAAGCTATACCAAGTACT                            |                                                                       |                                                                    |
| 5760-14kF           | CTCAACACTCCTCTTCACAG                            |                                                                       |                                                                    |
| 5760-14kR           | AGTGAGAGAAGCGTAGAGAC                            |                                                                       |                                                                    |
| RM53266F            | AGCCTTCCTAACCAATCTGG                            |                                                                       |                                                                    |
| RM53266R            | CCATCATTTCGGCTCTTCAC                            |                                                                       |                                                                    |
| 3770F               | GTCACCAGTCACCACCGATC                            |                                                                       |                                                                    |
| 3770R               | CGTGATAACCGCGAGACATA                            |                                                                       |                                                                    |
| gRNA1-F             | GCAGGTACGTATACCAAGTTGTCCG                       |                                                                       | For the 1 <sup>st</sup> guide RNA to delete the 53 kb of Xa7 locus |
| gRNA1-R             | AAACCGGACAACCTGGTATACGTAC                       |                                                                       |                                                                    |
| gRNA2-F             | GCAGGTTTGTCCAATGAGTTGCTG                        |                                                                       | For the 2 <sup>nd</sup> guide RNA to delete the 53 kb of Xa7 locus |
| gRNA2-R             | AAACCAGCAACTCATTGGACAAAC                        |                                                                       |                                                                    |
| gRNA3-F             | TGTTGGATGATCAGCGGCCGCCA                         |                                                                       | For guide RNA at the 1 <sup>st</sup> site of Xa7                   |
| gRNA3-R             | AAACTGGCGGCCGCTGATCATCC                         |                                                                       |                                                                    |
| gRNA4-F             | GTGTGAGGAAGACGCCGGAGTTGA                        |                                                                       | For guide RNA at the 2 <sup>nd</sup> site of Xa7                   |
| gRNA4-R             | AAACTCAACTCCGGCGTCTTCCTC                        |                                                                       |                                                                    |
| Xa7aRT-F            | CGTATGCCCCGTTGCAGTTGCAG                         | RT-PCR for Xa7 expression                                             |                                                                    |
| Xa7aRT-R            | CGGAGTTGACGGTCAGCAGTCG                          |                                                                       |                                                                    |
| Xa27L-F4,<br>112.5R | ATAGGCCGGTATCCCAGCTCT<br>ACTGGAGCAGAGGAATGTGC   | For genotyping Xa7 CRISPR plant                                       |                                                                    |
| EP53-F              | TGTAGAAACCATGTCTCATGC                           | For genotyping large deletion                                         |                                                                    |
| BTB-R1              | ACTACCACACCAGCCAGCAAG                           |                                                                       |                                                                    |
| EP53R               | CTTGGATGGAGCTCCAGATG                            | With EP53-F as internal primers for zygosity of large deletion plants |                                                                    |
| Pro2.7k<br>HindF    | TATGACCATGATTACGCCAAGCTTC<br>TCATCCAACCGTTCTG   | Amplify 2.7 kb Xa7 promoter                                           |                                                                    |
| Xa7aATG-R           | AGAAATTTACCCTCAGATCTACCAT<br>GGATGATGGATCCCCCAG |                                                                       |                                                                    |
| DeleBEF3            | ATACGAACGAAGGCTTTGAAGC                          | Delete 20 bp for mutant EBE                                           |                                                                    |

|          |                                                  |  |
|----------|--------------------------------------------------|--|
| DeleBER3 | TTCAAAGCCTTCGTTTCGTATGGGTT<br>ATATATTGGTTTTAGCAG |  |
|----------|--------------------------------------------------|--|

### Supplemental Information 1. The cDNA sequence of *Xa7*.

CCCCTTCCCAACCACAGCCAGCGGTTTCCAAACTCCACGCCTCGCTCAACCTGGGGGATCCATCATCC**ATGGCGGCC**  
GCTGATCATCCTGATCGTATGCCCGTTGCAGTTGCAGGCTTGCGCCACCATTACGCCTTCCcTGCAAACCTTCGCC  
CGCCGCTCGACTGCTGACCGTCAACTCCGGCGTCTTCTCATCTCCACCGCCGGGGCCATCGTCCTCGTCCACACCG  
CCGGTAACCCACCCGCCATCGACAACGATCCAGCCTACGCCTTGGTCGCATTTCGTGCTCTTCTCCTCGGAATCTGG  
CTCATGTCTATTGCCCTCGTCGCCGACCAGTTCCcGCGCGCCGCTGGGGTGCCTGGCCATTGCCAGGGCGCTGCA  
GGATTACCTCATCGGTGGCAAT**TAACT**AGAAAGCTTCGACCATGGCTCTGCACATTCcTCTGCTCCAGTTGTTCCCGG  
CTTCCCGTACGTGTGCCTGATGATTGTCTTTCTCTGTTTATTTGGCTAGTATTTTAGGCTTGGAAAGTTGAAAACTG  
TAAATCTGCTTCTTTTTCCCTCTGTACTACTACTAGACTTTCTTTTTTAAaGCTGACGTCATACACACAcCCCAGAT  
TCATAACGTGTCGTATAGTAAATGTATTTCGAGGCTTGTAAATAAAaAGGCACCCGTAGGTGTATGCTCTGTTTCAGTCT  
GATGTTCTAAATAATCAAGATACTATTAGTCGT

### Supplemental Information 2. gBlocks of *Xa7* homologous genes.

gBlock cloned into pBY02 at EcoRI-HindIII through Gibson cloning. Sequences shaded in yellow are overlapping regions to facilitate the insertion of gBlocks in pBY02 through Gibson cloning. The start and stop codons are in red. Sequences for EcoRI and HindIII are underlined. The Kozac sequence for optimal expression of gene under 35S promoter is in bold.

*Do\_Xa7* gBlock

**GAGAACACGGGGGACTCTAGGAATTCGATCTACCATGGCGGACCGGCCGGCAGCAATCCATCAGGGCCTGGCGCCGG**  
TGGGCTTTGTGGTCCGGCAACAGCGAGCGATCGCCCCCTCGTCGCGCCCGACTCCTGATGATCAATTCGGGCACCCTC  
CTGATCTCGGCCGCCTGGTCCGTCATCATCATCCACAGCACTTCATCAGGCACTACAGCCGGTGGTGGTGGGCTTT  
CGCCCTCGTCACATTCCTCCTCTTCTTCTCGGCGTGTGCTGGTGATGGTGGCGCTTGTGCTTACAGGTTCCGGC  
GAGCGGCAGCGGTGGCGTGGCCATTGCGAGGGCGCTCCGCCGCTACTTGCTCGGTCTTGGGTGG**TAAGCTTCTAGA**  
**CTAGTGAGCTCGAAT**

*Si\_Xa7* gBlock

**GAGAACACGGGGGACTCTAGGAATTCGATCTACCATGGCGGGCCGGCCAGCAGAACTCCATCTCCAGCGAGTGATCG**  
CAGGCCGCGGTGCGCGGCTCCTGGTCAACGCCGGCGCCCTGCTCATCTCGGCCGCGGGTCCGTATCATCCACGCC  
GCTGCCACGCCCTCTGACGCTTCTCTGGCCCGGCGCGCCGCTCATCGGTTTTGCATCTTCGTCTCGGCGTGTG  
GCTGGTGATGTGCGGCGCTCGTCGCCGACCGGTTCCCAAGAGCGGCAAGGGCCGCGTGGCCATTGCGAGGGCACTCC  
AACGCTACGTGTTCCGTCTTGTGGGTGG**TAAGCTTCTAGACTAGTGAGCTCGAAT**

*Ph\_Xa7* gBlock. (codon optimized for *N. benthamiana* due to high GC of the original sequence)

**GAGAACACGGGGGACTCTAGGAATTCGATCTACCATGGCCGGTCTCCAACCAGCAGCCATCCACCTTCAACGTAGAC**  
AACAGGCTATTGCTGGTAGGCGAGTACGTCTCTTAGTAAACGCAGGAGCACTGTTGGTATCCGCAGGAGGCAGTGTG  
GTTATCATTACGCAGCTACTCCTCAGACGACGCCGAGGAGGGCCCGCCTGCTCTCTGGTGGCCTTTTCTGTCTT  
TCTGCTGGGAGTCTCTTTAGTCACGCTGGCCTTAGCTGCTGATAGATTCCACGTGCAGCAAGGGTTGGGGCCGCCG  
TAGCAACAGCTACTAATAGGTAATTTGTTGGACTCGGCTGGTAA**TAAGCTTCTAGACTAGTGAGCTCGAAT**  
gBlock cloned into pBY02 at EcoRI-HindIII through Gibson cloning.

*Sb\_Xa7* gBlock (codon optimized for *N. benthamiana* due to high GC of the original sequence)

**GAGAACACGGGGGACTCTAGGAATTCGATCTACCATGTCTCGACCCGCCGAGATGCGTAACCCCCGTCACGCAGACG**  
ATGGCGATTTGCAGTTAGCTTGGATTGGTAGAAGGCGAAGGGCCTTCAACAACAACCTCTGTTGGATTCCGGAGGC

AGGGCCTGCATGTTGTTAGGGGCTCTGGTCCTCACTTGGGATCAGCTCGCCCTCGCAAGTTCTTCCAGCCCCGAGCA  
TGTCTGCTGGCTGCATTTGTTCTTTGGTTACTGGGGGCCGCCCTCGTGATGCTTAGTCTGGTAAGCCGAAGTTTC  
CAAGACTGGCATCCGCCGGTGCAGCCCTGGTAATGGCACTTAGGAATTATTTGTTAGGGGGTGGTGGGCTCTAAGCT  
TCTAGACTAGTGAGCTCGAAT

Op\_Xa7 gBlock

GAGAACACGGGGGACTCTAGGAATTCGATCTACCATGGTGAACCGGACAGCCGCTCATCCGCAGATGCCTGTTTCAGG  
CGCTGCGCCGCAATCGCATCGCGCAGGTAAACAGGGTGCCTCGCCGCTCGCCGTGCTCGAGCCCGACTGCTGATCGTC  
AACTCCGGCGTTTTCTCATCTCCACCTCCGGAGCCATCGTCGTCTCCACACCGCTGGAAACCCCTTCGCCCTCGT  
CGCATTCTGCTCTTCTACTTGGCATCTGGCTCGTGCTTCTTGCCTCGTCGCCGACAAGTTCCCGCGAGCCGCCA  
GGTTCGCCGTGCCATTGCCAGTGCCTGCAGGATCACCTCATAGGCGGCAACTAGTAAGCTTCTAGACTAGTGAGC  
TCGAAT

O1\_Xa7 gBlock

GAGAACACGGGGGACTCTAGGAATTCGATCTACCATGGCGAATCGGACAGCTGCTCATCCGCGGATGCCCGTACAGG  
GGCTGCGCCGCAATCAAATCGCGCGGGGGCCCGCTCGCCGTTCTCGACTGCTGATCGTCAACACCGGCGTTTTTC  
CTCATCTCCACCTCCGGGGCCATCGTCGTCTCCACACCGCTGGAAACCCCTCCTCCGCCATCGACGACGGTCCGTC  
CTCCGCCCTCGTCGCATTCTGCTCTTCTACTTGGCATCTGGCTCGTGCTTCTTGCCTCGTCGCCGACAAGTTCC  
CGCGAGCCGCCAGGGTGCCTCGCCATTGCTAGTGCCTGCAGGATCACCTCATAGGCGGCAACTAGTAAGCTTCT  
AGACTAGTGAGCTCGAAT

>O1\_XA7 KN541332.1\_FGP003 (*Oryza longistaminata*)

MANRRTAAHPRMPVQGLRRNQIARGPAARRSRLIVNTGVFLISTSGAIVVVHTAGNPSSAIDDG  
PSSALVAFVLFLLGIWLVLLALVADKFPRAARVAVAIASALQDHLIGGN

>Op\_XA7 OPUNC06G22220 (*Oryza punctata*)

MVNRRTAAHPQMPVQALRRNRQAQVNRVPAARRARALLIVNSGVFLISTSGAIVVVHTAGNPF  
LVAFLVLFLLGIWLVLLALVADKFPRAARVAVAIASALQDHLIGGN

>Do\_XA7 BAE44\_0010678 (*Dichantherium oligosanthes*) (NCBI accession: OEL28303.1)

MADRPAAIHQGLAPVGFVVRQQRRAIAPRRARLLMINSGLLISAAWSVIIHSTSSGTTAGGGR  
AFALVTFLFLLGVSLVMVALVAYRFRRAAVGVAIARALRRYLLGLGW

>Sl\_XA7 LOC105914264 (*Setaria italica*) (NCBI accession: XP\_012700797.1)

MAGRPAELHLQRVIAGRRARLLVNAGALLISAAGSVIIHAAATPSDASSGPAPPLIAFCIFVLG  
VSLVMSALVADRFPRARAGVAIARALQRYVFLVGLGW

>Ph\_XA7 LOC112891075 (*Panicum hallii*) (NCBI accession: XP\_025813762.1)

MAGLQPAAIHLQRRQQAAGRRVLLVNAGALLVSAGGSVVIHAAATPSDDAAGGPACSLVAFS  
VFLVSLVTLALAADRFPRARVGAATATNRYLFLGLGW

>Sb\_XA7 SORBI\_3K004400 (*Sorghum bicolor*) (NCBI accession: OQU75609.1)

MSRPAEMRNPRHADDGDLQLAWIGRRRRGLQQQLLLDSGGRACMLLGGALVLTWDQLALASSSSP  
EHVLLAAFLVLLGAALVMLSLVSRFPRLASAGAALVMALRNYLLGGGGL

## Supplemental File 1. Program for genome assembly.

```
####The script uses illumina reads downloaded form the 3K rice genomes project
#Raw sequence data is also available from the http://gigadb.org/dataset/200001 - SRA at
PRJEB6180
#deposited the reads in a new folder rice3k
## use the Xa7 region as reference and create an index using bowtie2
bowtie2-build complete_Xa7.fasta cXa7

##create an accession list from the reads_dictionary that contains the sample accession and the run
id
## sample_accession (1st collumn) run_accession (2dn collum) in reads_dictionary
for x in `cut -f 1 reads_dictionary`
do
grep $x reads_dictionary | sed 's/$//g' | cut -f 2 > copy_list
#####
    for i in `cat copy_list`
    do
    cp "/rice3k/"$i"_1.fastq.gz" ./
    cp "/rice3k/"$i"_2.fastq.gz" ./
    gunzip *.fastq.gz
    done
####
##generate temporary files to map
cat *_1.fastq > $x"_1.fq"
cat *_2.fastq > $x"_2.fq"
rm *_1.fastq
rm *_2.fastq
rm *.fastq.gz
####

bowtie2 -x cXa7 -1 $x"_1.fq" -2 $x"_2.fq" -S $x"_results.sam" -p 8
rm *.fq

samtools view -bS -o $x"_results.bam" $x"_results.sam"
rm $x"_results.sam"

samtools view -b -F 4 $x"_results.bam" > $x"_mapped.bam"
rm *_results.bam

samtools sort $x"_mapped.bam" -o $x"_results_mapped.sorted.bam"

rm $x"_mapped.bam"

samtools index $x"_results_mapped.sorted.bam"
#####
done
```

```
###Generate a consensus Xa7 for each mapped rice3k  
# sam_list is the list of bam files generate above
```

```
for x in `cat sam_list`  
do  
samtools mpileup -uf complete_Xa7.fasta "$x"_results_mapped.sorted.bam" | bcftools call -c |  
vcfutils.pl vcf2fq > "$x"_cns.fq"  
done
```

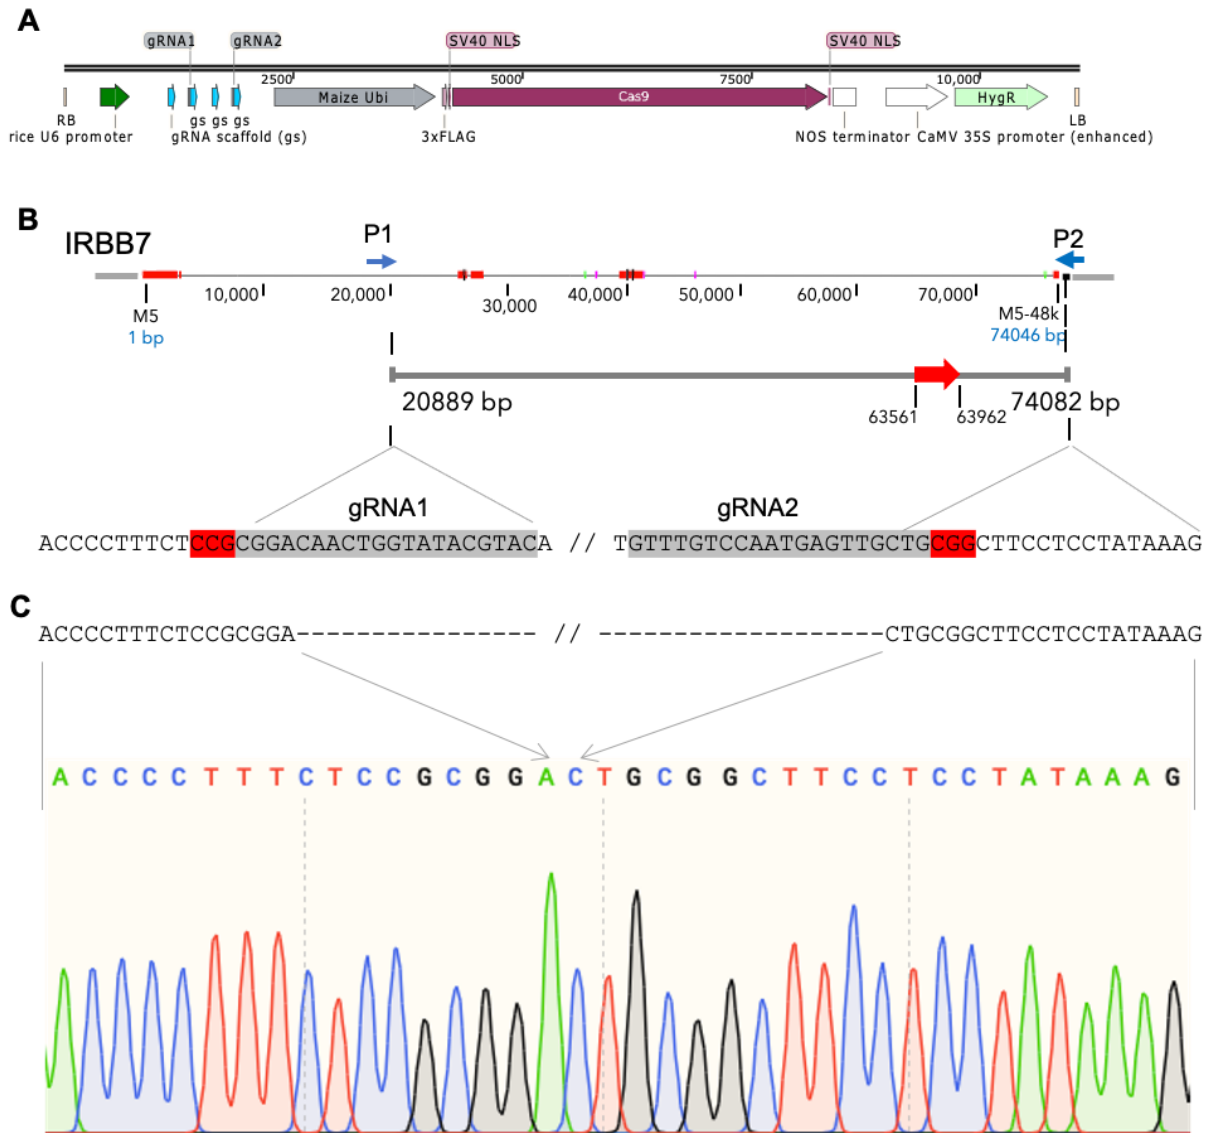

**Supplemental Figure 1.** Large chromosomal fragment deletion of *Xa7* locus.

(A) Schematic map of the CRISPR/Cas9 construct used for genome editing of *Xa7* locus. Guide RNA guides are under rice U6 promoters and Cas9 under maize ubiquitin 1 gene promoter. Hygromycin resistance gene is under the CaMV 35S promoter.

(B) *Xa7* locus delimited by two markers with guide RNA target sites. P1 and P2 are two deletion-specific primers to screen and identify the CRISPR-induced large deletion lines. Guide RNA target sites are in shaded with adjacent Cas9 PAM (protospacer adjacent motif) shaded in red.

(C) Sequencing chromatogram of PCR-amplicon from the T0 nb7-1 line. PCR-amplicon with two primers (P1 and P2) and genomic DNA of nb7-1 was subjected to Sanger sequencing.

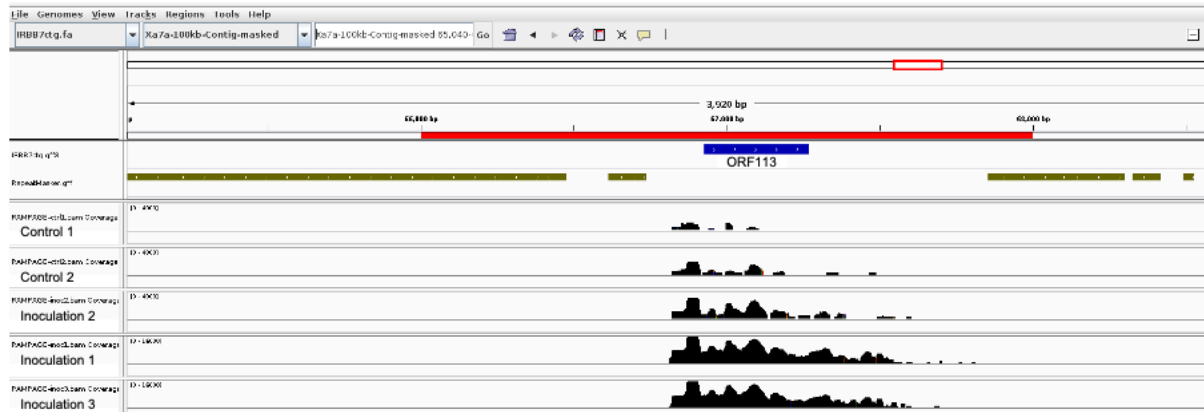

**Supplemental Figure 2.** Screenshot of RAMPAGE analysis displayed with the Integrative Genomics Viewer (Thorvaldsdóttir, Robinson et al. 2013).

RAMPAGE reads from two RNA samples derived from IRBB7 leaves inoculated with MX53 (Control 1 and 2) and three RNA samples (Inoculation 1, 2, and 3) derived from IRBB7 leaves inoculated with PXO86 were used for analysis. The tracks show read coverage per position. Note that Control 1 and 2 and Inoculation 2 coverage is shown on a scale 0-4000, compared to 0-16000 for Inoculation 1 and 3, in order to accommodate different library sizes (read pairs aligned are 7,021,714; 8,098,348; and 6,507,082 for Control 1 and 2 and Inoculation 2, respectively; compared to 32,296,182 and 37,344,426 for Inoculation 1 and 3, respectively); Alignment and analysis were done with GoRAMPAGE (<https://github.com/BrendelGroup/GoRAMPAGE>). Counts are displayed on a log scale. For example, site 66,859 has coverage 9 and 31 for Control, compared to 9144, 217, and 6100 for Inoculated.

Thorvaldsdóttir, H., J. T. Robinson and J. P. Mesirov (2013). "Integrative Genomics Viewer (IGV): high-performance genomics data visualization and exploration." *Brief Bioinform* **14**(2): 178-192.



**A**

MA--XAXXXXXXPAXXXXLXXXXXXXRRXXAXXXXRARLLXVNSGXXLISXXGA/VXXHAXXXX-XXX

Sb\_XA7 MS-RPAEMRNPRHADDGDLQLAWIGRRRR-----GLQQQLLLDSGGRACMLL GALVLTWDQLALA-SSS 62

Ph\_XA7 MA-----GLQPAAIH-----LQRRQQA IAGRRVRLL-VNAGALLVSAGGSVVIHAAATPSD-DAA 53

Si\_XA7 MA-----G-RPAELH-----LQR---VIAGRRARLL-VNAGALLISAAGSVIIHAAATPSD--AS 48

Do\_XA7 MA-----D-RPAAIHQGLAPVGFVVRQQRAIAPRRARLLMINSGLTLLISAASVSVIIHSTSSGT-TAG 61

Op\_XA7 MVNRTAAHP-QMPVQ--ALRRNRIAQVNRVPAARRARARLLIVNSGVFLISTSGAIVVHTAGNPF---- 67

Ol\_XA7 MANRTAAHP-RMPVQ--GLRRNQIA---RGPAAARRS--LLIVNTGVFLISTSGAIVVHTAGNPPSAID 62

XA7 MA--AADHPDRMPVAVAGLRHHYAF-----PANLRPAARLLTVNSGVFLISTAGAIVLVHTAGNPP-AID 62

XGPAALVAFVLFLLGXXLVX LALVADRFPRARVGVAVIAXALQXYLXGX-GX-

Sb\_XA7 SPEHVLAAAFVLWLLGAALVMSLVSRFPRLASAGAALVMALRNYLLGG-GGL 115

Ph\_XA7 GGPACSLVAFSVFLLGVS LVT LALAADRFPRAARVGA AVATATNRYLFG L-GW- 105

Si\_XA7 SGPARPLIAFCIFVLGVS LVM SALVADRFPRARAGVAIARALQRYVFG L-VG- 101

Do\_XA7 GGRAFALVTFLLFLLGVS LVMVALVAYRFRRAAAVGVAIARALRRYLLGL-GW- 113

Op\_XA7 -----ALVAFVLFLLGIWLVLLALVADKFPRAARVAVAIASALQDHLIG--GN- 109

Ol\_XA7 DGPSSALVAFVLFLLGIWLVLLALVADKFPRAARVAVAIASALQDHLIG--GN- 113

XA7 NDPAYALVAFVLFLLGIWLM SIALVADQFPRAAGVAVAIARALQDY LIG--GN- 113

**B**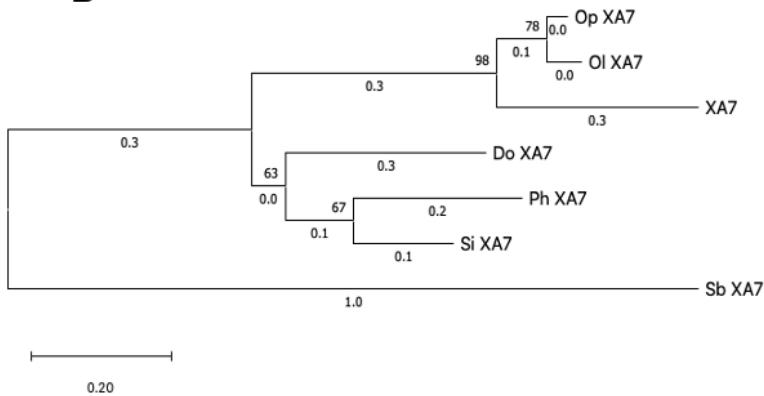**C**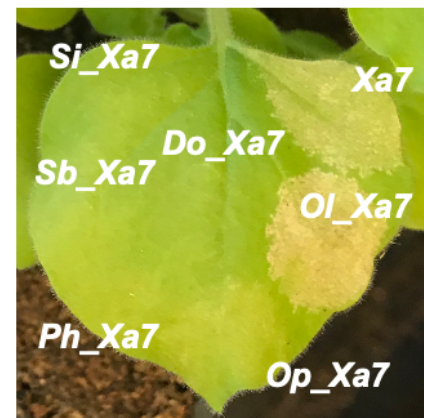

### Supplemental Figure 3. *Xa7* and homologs in diverse grass species.

(A) Amino acid alignment of seven *Xa7* homologs generated by ClustalX. Sequences are from *Do\_Xa7*, *Dichanthelium oligosanthes*; *Si\_Xa7*, *Setaria italica*; *Ph\_Xa7*, *Panicum hallii*; *Sb\_Xa7*, *Sorghum bicolor*; *Op\_Xa7*, *Oryza punctata*; *Ol\_Xa7*, *Oryza longistaminata*.

(B) Phylogenetic tree of seven *Xa7* homologs. The unrooted phylogenetic tree of 7 proteins was generated by using the Maximum Likelihood method and JTT matrix-based model. The tree with the highest log likelihood (-1290.17) is shown. The tree is drawn to scale, with branch lengths measured in the number of substitutions per site (next to the branches). The analyses were conducted in MEGA X (<http://www.megasoftware.net>).

(C) Cell death phenotypes caused by overexpression of *Xa7* and its homologs in *N. benthamiana* through agroinfiltration. Leaf image was taken three days post infiltration.
